# Supplementary material for: DNA methylation in peripheral tissues and left-handedness
Source: Sci Rep. 2022 Apr 4;12:5606. doi: 10.1038/s41598-022-08998-0 (PMC8980054; doi:10.1038/s41598-022-08998-0)
Supplement: Supplementary file 5 — Supplementary Information 5. [file 41598_2022_8998_MOESM5_ESM.xlsx]

## Sheet: content
sheet	Title
S15	Supplementary Table 15. Within-pairs analysis, NTR adults MZ twins, basic model (top 100 CpGs)
S16	Supplementary Table 16. Within-pairs analysis, NTR adults MZ twins, adjusted model (top 100 CpGs)
S17	Supplementary Table 17. Within-pairs analysis, NTR children MZ twins, basic model (top 100 CpGs)
S18	Supplementary Table 18. Within-pairs analysis, NTR children MZ twins, adjusted model (top 100 CpGs)
S19	Supplementary Table 19. EWAS of left-handedness, ALSPAC at birth, basic model (top 100 CpGs)
S20	Supplementary Table 20. EWAS of left-handedness, ALSPAC at birth, adjusted model (top 100 CpGs)
S21	Supplementary Table 21. EWAS of left-handedness, ALSPAC 7 years, basic model (top 100 CpGs)
S22	Supplementary Table 22. EWAS of left-handedness, ALSPAC 7 years, adjusted model (top 100 CpGs)
S23	Supplementary Table 23. EWAS of left-handedness, ALSPAC 17 years, basic model (top 100 CpGs)
S24	Supplementary Table 24. EWAS of left-handedness, ALSPAC 17 years, adjusted model (top 100 CpGs)
S25	Supplementary Table 25. EWAS of left-handedness, ALSPAC 24 years, basic model (top 100 CpGs)
S26	Supplementary Table 26. EWAS of left-handedness, ALSPAC 24 years, adjusted model (top 100 CpGs)
S27	Supplementary Table 27. EWAS of left-handedness, NTR children, basic model (top 100 CpGs)
S28	Supplementary Table 28. EWAS of left-handedness, NTR children, adjusted model (top 100 CpGs)
S29	Supplementary Table 29. CpGs from DMR-analysis of left-handedness in NTR children, adjusted model
		change direction of effect

## Sheet: S15
Supplementary Table 15. Within-pairs analysis, NTR adults MZ twins, basic model (top 100 CpGs)
	CHR	Position	Gene	Gene region	Weight	Estimate	t	CI low	CI high	p-value	q-value	Direction
cg17232991	4	8372840	ACOX3;ACOX3	Body;Body	133	-0.00434742	-4.80038	-0.00613886	-0.00255597	4.22452e-06	0.999995	--
cg03608583	2	232761931			133	0.0139456	4.63968	0.00799995	0.0198912	8.30184e-06	0.999995	++
cg23586792	2	200423026			133	0.00750412	4.49811	0.00420409	0.0108041	1.4869e-05	0.999995	++
cg19006130	11	118478252	PHLDB1;PHLDB1;PHLDB1	TSS200;5'UTR;TSS200	133	0.00913101	4.41568	0.00504058	0.0132214	2.07635e-05	0.999995	++
cg20458981	13	41885231	NAA16;NAA16;NAA16	TSS200;TSS200;TSS200	133	0.00576252	4.33559	0.00313339	0.00839165	2.86082e-05	0.999995	++
cg09441069	21	47569479	FTCD;FTCD	Body;Body	133	-0.00510105	-4.31424	-0.00743991	-0.00276219	3.11403e-05	0.999995	--
cg05914537	20	4764253	RASSF2;RASSF2	3'UTR;3'UTR	133	0.00662628	4.30276	0.00357999	0.00967256	3.25887e-05	0.999995	++
cg10536067	17	72890001	FADS6	TSS1500	133	0.00467322	4.30275	0.0025248	0.00682163	3.25898e-05	0.999995	++
cg06191165	1	82591536			133	0.00639931	4.2981	0.00345418	0.00934444	3.31945e-05	0.999995	++
cg24383528	10	127541906	BCCIP;DHX32	3'UTR;Body	133	0.00956966	4.247	0.00511246	0.0140269	4.05951e-05	0.999995	++
cg06598634	4	63416083			133	0.00643494	4.1991	0.00340359	0.0094663	4.89536e-05	0.999995	++
cg14817542	10	102295790	HIF1AN	1stExon	133	0.00312257	4.17797	0.00164416	0.00460098	5.31426e-05	0.999995	++
cg16688434	13	110768551			133	0.00859809	4.17527	0.00452461	0.0126716	5.37016e-05	0.999995	++
cg08931196	11	119205177	RNF26	TSS200	133	0.00388396	4.16152	0.00203779	0.00573012	5.66396e-05	0.999995	++
cg18476530	11	67141747	LOC100130987;CLCF1;CLCF1	Body;TSS1500;TSS200	133	0.0033209	4.15285	0.00173908	0.00490273	5.8571e-05	0.999995	++
cg14330078	3	187930521	LPP;LPP	TSS200;5'UTR	133	0.0036522	4.11034	0.00189458	0.00540982	6.89865e-05	0.999995	++
cg12937151	15	87758226			133	0.0198468	4.09043	0.0102491	0.0294445	7.4454e-05	0.999995	++
cg21335266	12	26278677	BHLHE41	TSS1500	133	-0.00250001	-4.07096	-0.00371477	-0.00128524	8.02009e-05	0.999995	--
cg00839132	18	74692235	MBP;MBP;MBP;MBP;MBP	3'UTR;3'UTR;3'UTR;3'UTR;3'UTR	133	0.00524562	4.06443	0.00269265	0.00779858	8.22212e-05	0.999995	++
cg02361493	12	131164500			132	-0.0041393	-4.06462	-0.00615388	-0.00212471	8.24748e-05	0.999995	--
cg26151467	13	112724221	SOX1;SOX1	1stExon;3'UTR	133	0.0114588	4.06058	0.00587667	0.0170409	8.34351e-05	0.999995	++
cg11309842	10	131341115	MGMT	Body	133	0.00528807	4.06013	0.00271172	0.00786443	8.35785e-05	0.999995	++
cg15780465	11	617476	IRF7;MUPCDH;IRF7;MUPCDH	TSS1500;Body;TSS1500;Body	132	0.00527104	4.03501	0.00268681	0.00785526	9.22837e-05	0.999995	++
cg03071143	19	11909233	ZNF491	TSS200	133	0.0054219	4.03022	0.00276074	0.00808305	9.3626e-05	0.999995	++
cg00580689	1	109585095	WDR47;WDR47;WDR47	TSS1500;TSS1500;TSS1500	133	0.00499105	4.02951	0.00254093	0.00744117	9.38781e-05	0.999995	++
cg20811730	1	150293902	PRPF3	TSS200	133	0.0100435	4.02638	0.00510929	0.0149777	9.49963e-05	0.999995	++
cg01453349	22	45705512	FAM118A;FAM118A;FAM118A	5'UTR;1stExon;TSS1500	133	-0.0163588	-4.02565	-0.0243971	-0.00832053	9.52595e-05	0.999995	--
cg10167849	6	34206152	HMGA1;HMGA1;HMGA1;HMGA1;HMGA1;HMGA1	5'UTR;5'UTR;5'UTR;5'UTR;5'UTR;TSS1500	131	0.00284659	4.02739	0.00144826	0.00424493	9.53345e-05	0.999995	++
cg26019112	11	31821313	PAX6;PAX6;PAX6	Body;Body;Body	133	0.00813956	4.02508	0.00413943	0.0121397	9.54656e-05	0.999995	++
cg15039603	21	46308308	ITGB2;ITGB2	Body;Body	133	-0.00360299	-4.02476	-0.0053738	-0.00183219	9.55809e-05	0.999995	--
cg23500835	11	8849195	ST5	5'UTR	133	-0.00726855	-4.00897	-0.010855	-0.00368211	0.000101457	0.999995	--
cg19191357	22	42196520	CCDC134	TSS200	133	0.00498516	4.00231	0.0025213	0.00744902	0.000104034	0.999995	++
cg23794200	6	102617822			133	-0.00811158	-4.00037	-0.0121226	-0.00410058	0.000104797	0.999995	--
cg21652107	4	48782392	FRYL	TSS200	132	0.00531003	3.98766	0.00267577	0.00794428	0.000110322	0.999995	++
cg00032912	15	96887529			133	0.00886752	3.97368	0.00445327	0.0132818	0.000115854	0.999995	++
cg18205465	7	45026543	C7orf40;SNORA9	TSS1500;TSS1500	132	0.00468313	3.97363	0.00235168	0.00701459	0.00011628	0.999995	++
cg22076676	2	43503935	THADA;THADA	Body;Body	133	0.00730752	3.97248	0.00366874	0.0109463	0.000116376	0.999995	++
cg25050951	15	30115147	TJP1;TJP1	TSS1500;TSS1500	133	0.00698661	3.96259	0.00349894	0.0104743	0.000120766	0.999995	++
cg03405789	8	67088895	CRH	3'UTR	133	0.0181046	3.95457	0.00904856	0.0271606	0.000124446	0.999995	++
cg02624129	11	130786230	SNX19;SNX19	1stExon;5'UTR	132	0.00650336	3.92876	0.00322875	0.00977798	0.000137474	0.999995	++
cg25540032	2	98885650	VWA3B	Body	133	0.0170582	3.9244	0.00846001	0.0256564	0.000139253	0.999995	++
cg25023298	10	77156697			133	0.0067048	3.92273	0.0033238	0.0100858	0.000140123	0.999995	++
cg19919303	11	129245922	BARX2;BARX2	1stExon;5'UTR	133	0.00406898	3.92176	0.00201662	0.00612134	0.00014063	0.999995	++
cg24875440	1	27986375			133	0.00570347	3.92044	0.00282573	0.00858121	0.000141317	0.999995	++
cg12417362	1	201617355	NAV1	TSS200	133	0.00887545	3.91825	0.00439475	0.0133562	0.000142474	0.999995	++
cg04801779	11	76998857	GDPD4	TSS1500	131	0.0148955	3.90863	0.00735607	0.022435	0.000148632	0.999995	++
cg01033175	3	101396021	ZBTB11;LOC100009676	TSS200;Body	133	0.00381396	3.89371	0.00187637	0.00575154	0.000156036	0.999995	++
cg07318428	10	11653985	USP6NL	TSS1500	132	-0.00295295	-3.89009	-0.00445463	-0.00145128	0.000158648	0.999995	--
cg12198841	5	115941397			133	0.00523879	3.8824	0.00256961	0.00790798	0.00016269	0.999995	++
cg19571071	16	27561715	GTF3C1;KIAA0556	TSS1500;Body	132	-0.00658691	-3.86555	-0.00995784	-0.00321599	0.000173659	0.999995	--
cg04432594	16	34408014			133	-0.00547444	-3.85206	-0.00828567	-0.00266322	0.000181908	0.999995	--
cg13384867	19	39663807	PAK4;PAK4;PAK4;PAK4;PAK4	Body;Body;Body;Body;Body	130	0.0022603	3.85333	0.00109973	0.00342087	0.000182798	0.999995	++
cg26300597	3	128840676	RAB43	TSS200	133	0.0144558	3.84837	0.00702539	0.0218862	0.000184383	0.999995	++
cg23872082	19	42817715	TMEM145	Body	133	0.00309556	3.84429	0.00150273	0.0046884	0.000187162	0.999995	++
cg18139806	3	64354189			133	0.00824716	3.84341	0.00400258	0.0124918	0.000187765	0.999995	++
cg21333665	17	73840659	UNC13D;UNC13D	5'UTR;1stExon	133	0.00424609	3.84223	0.00206007	0.00643211	0.00018858	0.999995	++
cg17472120	6	28058715	ZSCAN12L1	TSS1500	129	-0.0139202	-3.84392	-0.0210857	-0.00675474	0.000189815	0.999995	--
cg21023126	22	32870150	FBXO7;FBXO7	TSS1500;TSS1500	133	0.0131629	3.83274	0.00636945	0.0199563	0.000195243	0.999995	++
cg01640958	7	51698664			133	0.00479687	3.82379	0.00231538	0.00727836	0.000201737	0.999995	++
cg13446802	18	52576880	CCDC68;CCDC68	Body;Body	133	-0.00520409	-3.81697	-0.00790105	-0.00250713	0.000206819	0.999995	--
cg15920762	18	12657056	SPIRE1;SPIRE1;SPIRE1	TSS1500;Body;Body	132	0.00818292	3.81643	0.00394131	0.0124245	0.000207859	0.999995	++
cg18069290	12	58013539	SLC26A10	TSS200	133	-0.00314502	-3.81025	-0.00477776	-0.00151228	0.000211943	0.999995	--
cg22548015	20	30539544	PDRG1	Body	132	-0.0029636	-3.79761	-0.00450738	-0.00141981	0.000222578	0.999995	--
cg06336824	6	41755399	TOMM6;TOMM6	1stExon;5'UTR	133	-0.00315221	-3.79668	-0.00479453	-0.00150989	0.000222665	0.999995	--
cg10709246	19	17488116	PLVAP;PLVAP	5'UTR;1stExon	133	0.0089841	3.79155	0.00429698	0.0136712	0.000226859	0.999995	++
cg19267325	12	45270229	NELL2;NELL2;NELL2;NELL2;NELL2;NELL2;NELL2	Body;5'UTR;Body;1stExon;TSS1500;1stExon;5'UTR	133	0.00241896	3.78984	0.00115639	0.00368153	0.00022827	0.999995	++
cg09605254	8	124780730	FAM91A1	TSS200	133	0.00908844	3.78899	0.00434369	0.0138332	0.000228973	0.999995	++
cg15843818	2	165477582	GRB14	Body	132	0.00484351	3.78789	0.00231397	0.00737306	0.000230571	0.999995	++
cg06400065	11	111800554			133	0.0150837	3.78267	0.00719589	0.0229716	0.000234278	0.999995	++
cg22403811	8	85096015	RALYL;RALYL;RALYL;RALYL;RALYL	5'UTR;TSS1500;5'UTR;5'UTR;1stExon	133	0.0151034	3.77878	0.00719715	0.0230097	0.000237604	0.999995	++
cg09828625	20	23331259	NXT1	TSS200	133	-0.00362418	-3.7748	-0.00552334	-0.00172501	0.000241048	0.999995	--
cg14039020	8	99989605			132	-0.0145959	-3.77472	-0.0222453	-0.00694655	0.000241828	0.999995	--
cg26724186	19	3676340	PIP5K1C	Body	133	-0.00418211	-3.76929	-0.00637686	-0.00198737	0.000245903	0.999995	--
cg25196088	1	7703835	CAMTA1	Body	133	-0.00559798	-3.7678	-0.00853692	-0.00265904	0.000247226	0.999995	--
cg23405575	3	11034281	SLC6A1	TSS200	133	0.00705825	3.76243	0.00334738	0.0107691	0.000252067	0.999995	++
cg01081083	22	25202766	SGSM1;SGSM1;SGSM1;SGSM1	Body;Body;Body;Body	133	0.00873326	3.76121	0.00414026	0.0133263	0.000253183	0.999995	++
cg26744402	11	28588618			133	0.0197568	3.75988	0.00936261	0.030151	0.000254404	0.999995	++
cg26577658	16	84423876	ATP2C2	Body	131	-0.00332903	-3.75803	-0.00508156	-0.00157649	0.000257593	0.999995	--
cg21399079	2	105858139	GPR45	TSS200	133	0.00473067	3.75294	0.00223723	0.0072241	0.000260845	0.999995	++
cg00770693	12	132932098			133	-0.00539711	-3.75236	-0.00824226	-0.00255196	0.000261396	0.999995	--
cg07154904	12	133143645	FBRSL1	Body	132	-0.00384473	-3.75126	-0.00587226	-0.0018172	0.000263183	0.999995	--
cg26226202	17	44928552	WNT9B	TSS1500	133	0.0038646	3.74612	0.00182394	0.00590527	0.000267336	0.999995	++
cg22216491	4	110624749	CASP6;CASP6	TSS200;TSS200	133	0.00280995	3.73878	0.00132327	0.00429663	0.000274487	0.999995	++
cg08229018	4	119274133	PRSS12	TSS1500	131	0.0076721	3.73699	0.00361046	0.0117337	0.000277827	0.999995	++
cg14505299	7	51344674	COBL	Body	133	0.00569459	3.72964	0.00267434	0.00871484	0.000283638	0.999995	++
cg23049429	13	113345944	ATP11A;ATP11A	Body;Body	133	0.00881103	3.72616	0.00413354	0.0134885	0.000287204	0.999995	++
cg15234312	19	54372324	MYADM;MYADM;MYADM;MYADM;MYADM	TSS1500;5'UTR;5'UTR;5'UTR;TSS1500	133	0.00382127	3.72351	0.00179124	0.0058513	0.000289946	0.999995	++
cg19640500	14	55982148			133	0.00502462	3.72049	0.00235315	0.00769609	0.000293095	0.999995	++
cg13286620	3	14715425	C3orf20	TSS1500	133	0.0168184	3.72023	0.00787584	0.025761	0.000293371	0.999995	++
cg25091367	4	7289507	SORCS2	Body	133	0.0104218	3.71805	0.00487712	0.0159664	0.000295673	0.999995	++
cg01908551	17	81036175	METRNL	TSS1500	133	-0.00801237	-3.71641	-0.012277	-0.0037477	0.000297415	0.999995	--
cg17716930	19	51017331	ASPDH;ASPDH	TSS200;Body	133	-0.0119174	-3.71465	-0.0182635	-0.00557121	0.000299294	0.999995	--
cg16628119	14	93582398	ITPK1;ITPK1;ITPK1	TSS200;TSS200;TSS200	133	-0.00397559	-3.71204	-0.00609412	-0.00185705	0.000302096	0.999995	--
cg18108262	15	40857029	C15orf57;C15orf57;C15orf57;C15orf57;C15orf57	1stExon;5'UTR;1stExon;5'UTR;5'UTR	133	0.0040845	3.71105	0.00190734	0.00626166	0.000303175	0.999995	++
cg02084046	5	139027359	CXXC5	TSS1500	133	0.00552203	3.70898	0.00257698	0.00846707	0.00030542	0.999995	++
cg12079740	1	240473071	FMN2	Body	133	0.00630708	3.70321	0.0029381	0.00967606	0.000311785	0.999995	++
cg21245618	9	136847709	VAV2;VAV2	Body;Body	132	-0.0059009	-3.70383	-0.0090526	-0.00274919	0.000311947	0.999995	--
cg07063351	19	41060190	SPTBN4;SPTBN4	Body;Body	133	0.00483051	3.69446	0.00224414	0.00741688	0.00032167	0.999995	++
cg14675404	19	3292224	BRUNOL5	Body	132	0.016542	3.67973	0.00764895	0.025435	0.000339882	0.999995	++
cg24714106	15	37179779	LOC145845	TSS1500	133	0.00885498	3.67747	0.00409191	0.013618	0.000341713	0.999995	++

## Sheet: S16
Supplementary Table 16. Within-pairs analysis, NTR adults MZ twins, adjusted model (top 100 CpGs)
	CHR	Position	Gene	Gene region	Weight	Estimate	t	CI low	CI high	p-value	q-value	Direction
cg17232991	4	8372840	ACOX3;ACOX3	Body;Body	132	-0.00434022	-4.75579	-0.0061456	-0.00253484	5.13642e-06	0.999973	--
cg03608583	2	232761931			132	0.01404	4.61774	0.00802527	0.0200547	9.14735e-06	0.999973	++
cg19006130	11	118478252	PHLDB1;PHLDB1;PHLDB1	TSS200;5'UTR;TSS200	132	0.00933118	4.49903	0.00522823	0.0134341	1.48938e-05	0.999973	++
cg23586792	2	200423026			132	0.00748205	4.44543	0.0041525	0.0108116	1.85106e-05	0.999973	++
cg24383528	10	127541906	BCCIP;DHX32	3'UTR;Body	132	0.00978139	4.3173	0.00529944	0.0142633	3.09078e-05	0.999973	++
cg05914537	20	4764253	RASSF2;RASSF2	3'UTR;3'UTR	132	0.00666786	4.29618	0.00359754	0.00973817	3.36018e-05	0.999973	++
cg12937151	15	87758226			132	0.0206289	4.28317	0.0111011	0.0301566	3.53713e-05	0.999973	++
cg20458981	13	41885231	NAA16;NAA16;NAA16	TSS200;TSS200;TSS200	132	0.00570442	4.26065	0.00305583	0.008353	3.86493e-05	0.999973	++
cg06191165	1	82591536			132	0.00635006	4.25242	0.003396	0.00930413	3.9917e-05	0.999973	++
cg12198841	5	115941397			132	0.00555958	4.23333	0.00296158	0.00815758	4.30171e-05	0.999973	++
cg18476530	11	67141747	LOC100130987;CLCF1;CLCF1	Body;TSS1500;TSS200	132	0.00340843	4.22725	0.00181338	0.00500348	4.40508e-05	0.999973	++
cg09441069	21	47569479	FTCD;FTCD	Body;Body	132	-0.00499435	-4.19445	-0.00734985	-0.00263885	5.00582e-05	0.999973	--
cg10536067	17	72890001	FADS6	TSS1500	132	0.00455413	4.16101	0.00238899	0.00671926	5.69842e-05	0.999973	++
cg11309842	10	131341115	MGMT	Body	132	0.00541062	4.15489	0.0028345	0.00798674	5.83494e-05	0.999973	++
cg14817542	10	102295790	HIF1AN	1stExon	132	0.0030856	4.13527	0.0016095	0.00456169	6.29347e-05	0.999973	++
cg23500835	11	8849195	ST5	5'UTR	132	-0.00749465	-4.11617	-0.0110966	-0.0038927	6.7729e-05	0.999973	--
cg00839132	18	74692235	MBP;MBP;MBP;MBP;MBP	3'UTR;3'UTR;3'UTR;3'UTR;3'UTR	132	0.00533708	4.11568	0.00277177	0.0079024	6.78552e-05	0.999973	++
cg21335266	12	26278677	BHLHE41	TSS1500	132	-0.00252298	-4.10305	-0.0037394	-0.00130655	7.12221e-05	0.999973	--
cg24875440	1	27986375			132	0.00592519	4.08336	0.00305465	0.00879573	7.67905e-05	0.999973	++
cg08931196	11	119205177	RNF26	TSS200	132	0.00383458	4.07691	0.00197393	0.00569523	7.87023e-05	0.999973	++
cg20811730	1	150293902	PRPF3	TSS200	132	0.0101963	4.06769	0.00523755	0.0151551	8.15149e-05	0.999973	++
cg16688434	13	110768551			132	0.00850694	4.0645	0.00436652	0.0126474	8.25102e-05	0.999973	++
cg15780465	11	617476	IRF7;MUPCDH;IRF7;MUPCDH	TSS1500;Body;TSS1500;Body	131	0.00532158	4.03649	0.00271335	0.00792982	9.2112e-05	0.999973	++
cg01453349	22	45705512	FAM118A;FAM118A;FAM118A	5'UTR;1stExon;TSS1500	132	-0.0164824	-4.03534	-0.0245626	-0.00840229	9.21658e-05	0.999973	--
cg06598634	4	63416083			132	0.00621148	4.03225	0.0031641	0.00925886	9.32528e-05	0.999973	++
cg26151467	13	112724221	SOX1;SOX1	1stExon;3'UTR	132	0.0114528	4.03217	0.00583391	0.0170717	9.32802e-05	0.999973	++
cg21652107	4	48782392	FRYL	TSS200	131	0.00539045	4.02403	0.00274028	0.00804063	9.65541e-05	0.999973	++
cg00580689	1	109585095	WDR47;WDR47;WDR47	TSS1500;TSS1500;TSS1500	132	0.00502491	4.00057	0.00254015	0.00750968	0.000105096	0.999973	++
cg23872082	19	42817715	TMEM145	Body	132	0.00322576	3.9929	0.00162759	0.00482393	0.000108171	0.999973	++
cg14330078	3	187930521	LPP;LPP	TSS200;5'UTR	132	0.00354077	3.99073	0.00178558	0.00529596	0.000109057	0.999973	++
cg18205465	7	45026543	C7orf40;SNORA9	TSS1500;TSS1500	131	0.0047406	3.98783	0.00238876	0.00709243	0.000110648	0.999973	++
cg23794200	6	102617822			132	-0.00814867	-3.98595	-0.0121929	-0.00410446	0.000111033	0.999973	--
cg15039603	21	46308308	ITGB2;ITGB2	Body;Body	132	-0.00357602	-3.97918	-0.00535383	-0.00179821	0.000113886	0.999973	--
cg27418500	2	123758682			132	0.00788945	3.97164	0.00395979	0.0118191	0.00011715	0.999973	++
cg00032912	15	96887529			132	0.00893608	3.96672	0.00447957	0.0133926	0.00011933	0.999973	++
cg10167849	6	34206152	HMGA1;HMGA1;HMGA1;HMGA1;HMGA1;HMGA1	5'UTR;5'UTR;5'UTR;5'UTR;5'UTR;TSS1500	130	0.00282116	3.96795	0.00141446	0.00422787	0.000119627	0.999973	++
cg22076676	2	43503935	THADA;THADA	Body;Body	132	0.00732756	3.95856	0.00366571	0.0109894	0.000123024	0.999973	++
cg26019112	11	31821313	PAX6;PAX6;PAX6	Body;Body;Body	132	0.00804055	3.94872	0.00401238	0.0120687	0.000127628	0.999973	++
cg02361493	12	131164500			131	-0.00404192	-3.94764	-0.00606755	-0.00201629	0.00012859	0.999973	--
cg03071143	19	11909233	ZNF491	TSS200	132	0.00536795	3.94037	0.002673	0.0080629	0.000131666	0.999973	++
cg09828625	20	23331259	NXT1	TSS200	132	-0.00377585	-3.94009	-0.00567162	-0.00188007	0.000131799	0.999973	--
cg19267325	12	45270229	NELL2;NELL2;NELL2;NELL2;NELL2;NELL2;NELL2	Body;5'UTR;Body;1stExon;TSS1500;1stExon;5'UTR	132	0.00251142	3.93718	0.00124955	0.00377329	0.000133238	0.999973	++
cg01033175	3	101396021	ZBTB11;LOC100009676	TSS200;Body	132	0.00387416	3.92755	0.00192282	0.00582551	0.000138095	0.999973	++
cg19191357	22	42196520	CCDC134	TSS200	132	0.00492079	3.92464	0.00244044	0.00740114	0.000139595	0.999973	++
cg26724186	19	3676340	PIP5K1C	Body	132	-0.00431762	-3.89383	-0.00651116	-0.00212408	0.000156472	0.999973	--
cg25540032	2	98885650	VWA3B	Body	132	0.0170535	3.89223	0.00838602	0.0257211	0.000157403	0.999973	++
cg14039020	8	99989605			131	-0.0150905	-3.88464	-0.0227758	-0.00740516	0.000162405	0.999973	--
cg01640958	7	51698664			132	0.00487914	3.87384	0.00238752	0.00737075	0.000168447	0.999973	++
cg03405789	8	67088895	CRH	3'UTR	132	0.0178724	3.87356	0.00874493	0.027	0.000168619	0.999973	++
cg07154904	12	133143645	FBRSL1	Body	131	-0.0039572	-3.87123	-0.00597951	-0.00193488	0.000170621	0.999973	--
cg19640500	14	55982148			132	0.00519705	3.8532	0.00252888	0.00786522	0.000181713	0.999973	++
cg26300597	3	128840676	RAB43	TSS200	132	0.0145764	3.84674	0.00708027	0.0220725	0.000186068	0.999973	++
cg01081083	22	25202766	SGSM1;SGSM1;SGSM1;SGSM1	Body;Body;Body;Body	132	0.00893589	3.84568	0.00433922	0.0135326	0.000186792	0.999973	++
cg21023126	22	32870150	FBXO7;FBXO7	TSS1500;TSS1500	132	0.0132761	3.84508	0.00644573	0.0201064	0.000187203	0.999973	++
cg22403811	8	85096015	RALYL;RALYL;RALYL;RALYL;RALYL	5'UTR;TSS1500;5'UTR;5'UTR;1stExon	132	0.0155872	3.84461	0.00756682	0.0236076	0.000187527	0.999973	++
cg22548015	20	30539544	PDRG1	Body	131	-0.0030115	-3.8423	-0.0045621	-0.00146089	0.000189718	0.999973	--
cg17472120	6	28058715	ZSCAN12L1	TSS1500	128	-0.0140753	-3.84086	-0.021327	-0.00682369	0.000192579	0.999973	--
cg04801779	11	76998857	GDPD4	TSS1500	130	0.014748	3.83205	0.00713346	0.0223625	0.000197581	0.999973	++
cg17716930	19	51017331	ASPDH;ASPDH	TSS200;Body	132	-0.0124171	-3.82939	-0.0188317	-0.0060025	0.000198258	0.999973	--
cg25050951	15	30115147	TJP1;TJP1	TSS1500;TSS1500	132	0.00691721	3.82909	0.00334354	0.0104909	0.000198479	0.999973	++
cg21399079	2	105858139	GPR45	TSS200	132	0.00481738	3.81459	0.0023191	0.00731566	0.000209252	0.999973	++
cg18139806	3	64354189			132	0.00824178	3.8112	0.00396381	0.0125198	0.000211854	0.999973	++
cg12417362	1	201617355	NAV1	TSS200	132	0.00876771	3.80801	0.00421294	0.0133225	0.000214322	0.999973	++
cg07318428	10	11653985	USP6NL	TSS1500	131	-0.00289518	-3.80535	-0.00440037	-0.00138999	0.000217068	0.999973	--
cg15843818	2	165477582	GRB14	Body	131	0.00492945	3.8003	0.00236325	0.00749566	0.000221087	0.999973	++
cg19459207	5	49737773	EMB	TSS1500	132	0.014577	3.79673	0.00698183	0.0221721	0.000223292	0.999973	++
cg02624129	11	130786230	SNX19;SNX19	1stExon;5'UTR	131	0.00626398	3.79403	0.00299766	0.00953031	0.000226173	0.999973	++
cg04432594	16	34408014			132	-0.00545744	-3.78892	-0.00830683	-0.00260805	0.00022971	0.999973	--
cg26744402	11	28588618			132	0.0199406	3.78591	0.00952112	0.0303601	0.000232225	0.999973	++
cg00770693	12	132932098			132	-0.00545512	-3.78568	-0.00830575	-0.0026045	0.000232423	0.999973	--
cg13446802	18	52576880	CCDC68;CCDC68	Body;Body	132	-0.00522694	-3.78488	-0.0079589	-0.00249499	0.000233092	0.999973	--
cg15920762	18	12657056	SPIRE1;SPIRE1;SPIRE1	TSS1500;Body;Body	131	0.0081641	3.783	0.00389456	0.0124336	0.000235387	0.999973	++
cg19571071	16	27561715	GTF3C1;KIAA0556	TSS1500;Body	131	-0.00649034	-3.78059	-0.00988673	-0.00309395	0.000237452	0.999973	--
cg09605254	8	124780730	FAM91A1	TSS200	132	0.00909064	3.7776	0.00433008	0.0138512	0.000239324	0.999973	++
cg09096054	13	72408750	DACH1;DACH1;DACH1	Body;Body;Body	130	-0.00505234	-3.76868	-0.00770477	-0.0023999	0.000248631	0.999973	--
cg25023298	10	77156697			132	0.00645012	3.76285	0.0030591	0.00984113	0.000252421	0.999973	++
cg25196088	1	7703835	CAMTA1	Body	132	-0.00567481	-3.76266	-0.00865838	-0.00269125	0.000252591	0.999973	--
cg25091367	4	7289507	SORCS2	Body	132	0.0105545	3.7565	0.00499629	0.0161126	0.000258264	0.999973	++
cg12079740	1	240473071	FMN2	Body	132	0.00641535	3.75483	0.00303541	0.00979528	0.000259822	0.999973	++
cg26029744	1	163291534	NUF2;NUF2	TSS200;TSS200	131	-0.00331274	-3.7512	-0.00505988	-0.0015656	0.000264003	0.999973	--
cg25147139	12	49740718	DNAJC22	TSS1500	132	0.00314894	3.74314	0.00148473	0.00481315	0.000270982	0.999973	++
cg10747266	6	31870263	ZBTB12	TSS1500	132	0.004141	3.74161	0.0019516	0.0063304	0.00027248	0.999973	++
cg21333665	17	73840659	UNC13D;UNC13D	5'UTR;1stExon	132	0.00414648	3.73821	0.00195219	0.00634078	0.000275827	0.999973	++
cg13384867	19	39663807	PAK4;PAK4;PAK4;PAK4;PAK4	Body;Body;Body;Body;Body	129	0.00218116	3.7354	0.00102578	0.00333654	0.000281051	0.999973	++
cg18069290	12	58013539	SLC26A10	TSS200	132	-0.00310642	-3.73263	-0.00475277	-0.00146006	0.000281404	0.999973	--
cg10396171	16	605214			132	-0.0091248	-3.72865	-0.013966	-0.00428362	0.000285452	0.999973	--
cg26226202	17	44928552	WNT9B	TSS1500	132	0.00386727	3.72567	0.00181385	0.0059207	0.000288509	0.999973	++
cg14675404	19	3292224	BRUNOL5	Body	131	0.0168428	3.72156	0.00788918	0.0257964	0.000293614	0.999973	++
cg06336824	6	41755399	TOMM6;TOMM6	1stExon;5'UTR	132	-0.00311421	-3.71922	-0.00477064	-0.00145777	0.000295252	0.999973	--
cg19919303	11	129245922	BARX2;BARX2	1stExon;5'UTR	132	0.00380315	3.71789	0.00177955	0.00582675	0.000296657	0.999973	++
cg18108262	15	40857029	C15orf57;C15orf57;C15orf57;C15orf57;C15orf57	1stExon;5'UTR;1stExon;5'UTR;5'UTR	132	0.00410061	3.7113	0.00191486	0.00628636	0.000303732	0.999973	++
cg21245618	9	136847709	VAV2;VAV2	Body;Body	131	-0.00596051	-3.71143	-0.00913777	-0.00278325	0.000304444	0.999973	--
cg08229018	4	119274133	PRSS12	TSS1500	130	0.00765922	3.71038	0.00357502	0.0117434	0.000306446	0.999973	++
cg06400065	11	111800554			132	0.0149358	3.70551	0.00696212	0.0229095	0.000310083	0.999973	++
cg16628119	14	93582398	ITPK1;ITPK1;ITPK1	TSS200;TSS200;TSS200	132	-0.00399074	-3.70466	-0.00612174	-0.00185974	0.000311018	0.999973	--
cg22216491	4	110624749	CASP6;CASP6	TSS200;TSS200	132	0.00281113	3.70386	0.0013097	0.00431256	0.000311906	0.999973	++
cg01184139	5	180649358	TRIM41;TRIM41	TSS1500;TSS1500	131	-0.00344752	-3.69034	-0.00529573	-0.00159932	0.000328201	0.999973	--
cg26577658	16	84423876	ATP2C2	Body	130	-0.00326376	-3.68966	-0.0050139	-0.00151362	0.000329903	0.999973	--
cg23405575	3	11034281	SLC6A1	TSS200	132	0.00697157	3.68454	0.00322851	0.0107146	0.000334131	0.999973	++
cg13729766	8	145922737			132	0.006666	3.67945	0.00308206	0.0102499	0.000340218	0.999973	++

## Sheet: S17
Supplementary Table 17. Within-pairs analysis, NTR children MZ twins, basic model (top 100 CpGs)
	CHR	Position	Gene	Gene region	Weight	Estimate	t	CI low	CI high	p-value	q-value	Direction
cg12760522	chr14	83513860			85	-0.0135252	-5.33835	-0.0185635	-0.00848686	7.84351e-07	0.617842	--
cg02676199	chr14	23016309			86	-0.013129	-4.85696	-0.0185036	-0.00775446	5.37347e-06	0.999978	--
cg27340584	chr6	100439050	MCHR2;MCHR2	5'UTR;5'UTR	85	-0.0138976	-4.7909	-0.0196662	-0.00812895	7.07127e-06	0.999978	--
cg20023049	chr12	7295542	CLSTN3	Body	85	-0.00816483	-4.71155	-0.011611	-0.0047187	9.63216e-06	0.999978	--
cg09296044	chr15	43477606	CCNDBP1;CCNDBP1;CCNDBP1;CCNDBP1;CCNDBP1	1stExon;Body;TSS1500;5'UTR;Body	66	-0.0815445	-4.72813	-0.115988	-0.0471005	1.26002e-05	0.999978	--
cg08692733	chr10	112404738	RBM20	Body	86	-0.0265223	-4.53959	-0.0381386	-0.0149059	1.84239e-05	0.999978	--
cg20104456	chr19	51568523	KLK13	TSS200	84	-0.00542717	-4.54049	-0.00780453	-0.0030498	1.88199e-05	0.999978	--
cg05894673	chr19	42747827	GSK3A	TSS1500	79	-0.00454879	-4.51922	-0.00655267	-0.00254492	2.17823e-05	0.999978	--
cg18053628	chr13	103294959	TPP2	Body	86	-0.0297995	-4.49206	-0.0429893	-0.0166097	2.2074e-05	0.999978	--
cg06766817	chr6	158515036	SYNJ2	Body	84	0.0074597	4.48012	0.00414795	0.0107715	2.36483e-05	0.999978	++
cg25166820	chr11	68177631	LRP5	Body	80	-0.0179032	-4.47746	-0.0258621	-0.00994438	2.51188e-05	0.999978	--
cg04371358	chr3	194808257	XXYLT1;XXYLT1	Body;Body	86	-0.0207909	-4.44501	-0.0300908	-0.0114911	2.63728e-05	0.999978	--
cg12330998	chr2	42722347	KCNG3;KCNG3	TSS1500;TSS1500	84	-0.00289033	-4.43435	-0.00418674	-0.00159391	2.80887e-05	0.999978	--
cg27437721	chr10	134420300	INPP5A	Body	84	-0.0136233	-4.4016	-0.0197793	-0.00746733	3.17494e-05	0.999978	--
cg08763169	chr12	30990639			85	0.0080528	4.37496	0.00439245	0.0117131	3.46798e-05	0.999978	++
cg25257189	chr10	61666537	CCDC6	TSS200	85	-0.0011923	-4.35019	-0.00173734	-0.000647263	3.80318e-05	0.999978	--
cg07161172	chr15	71184870	LRRC49;THAP10	TSS200;TSS200	84	-0.00190963	-4.33148	-0.00278651	-0.00103275	4.12068e-05	0.999978	--
cg24875634	chr14	75083434			85	-0.013334	-4.31876	-0.0194738	-0.00719426	4.27369e-05	0.999978	--
cg05480623	chr6	32815009	TAP1	Body	86	-0.019838	-4.30977	-0.02899	-0.0106859	4.37303e-05	0.999978	--
cg00463551	chr5	61708395	IPO11	TSS200	81	-0.00248904	-4.30794	-0.00363886	-0.00133922	4.64539e-05	0.999978	--
cg09361491	chr1	47070176	MKNK1;MKNK1;MKNK1;MKNK1;MKNK1	TSS1500;TSS1500;TSS1500;TSS1500;TSS1500	85	-0.00417636	-4.24917	-0.0061309	-0.00222183	5.5239e-05	0.999978	--
cg25960044	chr4	103656296	MANBA	Body	85	-0.0206468	-4.2337	-0.0303448	-0.0109488	5.84634e-05	0.999978	--
cg11493038	chr5	158583464			85	0.0276728	4.23009	0.0146635	0.0406821	5.92416e-05	0.999978	++
cg15211655	chr18	21977340	OSBPL1A	5'UTR	80	-0.00348973	-4.24283	-0.00512687	-0.00185259	5.95606e-05	0.999978	--
cg06335372	chr3	42806748	CCDC13	5'UTR	85	-0.0176252	-4.22792	-0.0259152	-0.00933517	5.97122e-05	0.999978	--
cg07534157	chr20	3669782	SIGLEC1;SIGLEC1	ExonBnd;Body	86	-0.0133206	-4.21157	-0.0196092	-0.00703198	6.27912e-05	0.999978	--
cg10088477	chr19	36182907			86	-0.016475	-4.19729	-0.0242793	-0.00867075	6.61572e-05	0.999978	--
cg23378869	chr11	44630741	CD82;CD82	Body;Body	86	0.00561535	4.17547	0.00294144	0.00828925	7.16364e-05	0.999978	++
cg00804324	chr21	44490289	CBS;CBS;CBS	Body;Body;Body	85	-0.0287264	-4.16675	-0.0424363	-0.0150165	7.46302e-05	0.999978	--
cg15996950	chr13	112282703			86	0.0127039	4.16185	0.00663479	0.018773	7.52748e-05	0.999978	++
cg23124630	chr1	51208502	FAF1	Body	86	-0.0174228	-4.15453	-0.025761	-0.00908464	7.73048e-05	0.999978	--
cg24110768	chr12	58159478	CYP27B1	Body	83	-0.00754827	-4.15443	-0.0111627	-0.00393384	7.95202e-05	0.999978	--
cg04819351	chr15	36872220	C15orf41	Body	86	-0.0204193	-4.12927	-0.0302514	-0.0105873	8.47184e-05	0.999978	--
cg08504659	chr14	52734888	PTGDR	1stExon	83	-0.0052383	-4.13429	-0.00775884	-0.00271776	8.55081e-05	0.999978	--
cg14212442	chr13	44816973			86	-0.00970636	-4.12294	-0.0143872	-0.00502551	8.66819e-05	0.999978	--
cg14263489	chr11	62378600	EML3;EML3;EML3	Body;Body;Body	83	-0.0164552	-4.12655	-0.0243879	-0.00852252	8.79226e-05	0.999978	--
cg11498487	chr8	131309621	ASAP1IT1;ASAP1	TSS1500;Body	86	-0.015723	-4.10509	-0.0233383	-0.00810767	9.24532e-05	0.999978	--
cg02045559	chr21	43540621	UMODL1;UMODL1;UMODL1;UMODL1	Body;Body;Body;Body	72	-0.0305544	-4.14564	-0.0452503	-0.0158586	9.24591e-05	0.999978	--
cg04884798	chr14	24791720	ADCY4	Body	86	-0.0135571	-4.08543	-0.0201549	-0.0069592	9.92364e-05	0.999978	--
cg21850254	chr19	37959853	ZNF570	TSS200	84	-0.00334683	-4.08659	-0.00497574	-0.00171791	0.000100559	0.999978	--
cg25975192	chr4	897587	GAK	Body	86	-0.019866	-4.07873	-0.0295501	-0.0101818	0.000101656	0.999978	--
cg19888509	chr12	125145641			82	-0.0106084	-4.07116	-0.015793	-0.00542377	0.000108194	0.999978	--
cg02337166	chr17	38257303	NR1D1	TSS1500	81	-0.00380631	-4.0737	-0.00566576	-0.00194687	0.000108221	0.999978	--
cg21795544	chr5	42993440			85	-0.005056	-4.05924	-0.00753292	-0.00257908	0.00010994	0.999978	--
cg26676468	chr5	112539223	MCC;MCC	Body;Body	86	-0.0352581	-4.05633	-0.0525403	-0.0179758	0.00011016	0.999978	--
cg21151950	chr7	1718485			81	-0.00547445	-4.06246	-0.0081562	-0.0027927	0.000112629	0.999978	--
cg25277809	chr2	128453484			86	-0.0378944	-4.04901	-0.0565025	-0.0192864	0.000113085	0.999978	--
cg02960663	chr3	184279415	EPHB3	TSS200	86	-0.00217466	-4.0436	-0.00324396	-0.00110537	0.000115295	0.999978	--
cg11323295	chr2	19986514			85	-0.0289747	-4.04509	-0.0432189	-0.0147304	0.000115641	0.999978	--
cg08976342	chr10	31318135	ZNF438;ZNF438;ZNF438;ZNF438;ZNF438;ZNF438;ZNF438	5'UTR;5'UTR;5'UTR;5'UTR;5'UTR;5'UTR;Body	86	-0.0140017	-4.03183	-0.0209065	-0.00709685	0.000120248	0.999978	--
cg23505015	chr15	57859418			85	-0.0183927	-4.03077	-0.0274669	-0.00931853	0.000121702	0.999978	--
cg25579477	chr7	151496334	PRKAG2;PRKAG2	5'UTR;Body	86	-0.02107	-4.02684	-0.0314734	-0.0106666	0.000122408	0.999978	--
cg18655113	chr17	78152199	CARD14;CARD14;CARD14	TSS200;TSS200;Body	85	-0.00241113	-4.02458	-0.0036025	-0.00121975	0.00012441	0.999978	--
cg09713125	chr7	45077876	CCM2;CCM2;CCM2;CCM2;CCM2	Body;Body;Body;Body;Body	84	-0.0138004	-4.01757	-0.0206326	-0.00696832	0.000128618	0.999978	--
cg25029444	chr10	47623455	ANTXRLP1;ANTXRLP1	Body;Body	85	-0.0178169	-4.01464	-0.0266424	-0.00899151	0.000128887	0.999978	--
cg12043561	chr19	4152810	CREB3L3;CREB3L3;CREB3L3;CREB3L3	TSS1500;TSS1500;TSS1500;TSS1500	85	-0.0173648	-4.01458	-0.0259663	-0.00876319	0.000128915	0.999978	--
cg04136449	chr1	221920271			86	0.0085392	4.00806	0.00430318	0.0127752	0.000130875	0.999978	++
cg09379385	chr6	27774865	HIST1H2AI	TSS1500	85	-0.00492668	-4.0072	-0.00737159	-0.00248177	0.000132341	0.999978	--
cg18216046	chr9	73484191	TRPM3;TRPM3;TRPM3;TRPM3;TRPM3;TRPM3;TRPM3;TRPM3;TRPM3	TSS1500;TSS1500;TSS1500;TSS1500;TSS1500;TSS1500;TSS1500;TSS1500;Body	85	-0.0266349	-4.0033	-0.0398656	-0.0134042	0.000134185	0.999978	--
cg03567117	chr12	52448859	NR4A1;NR4A1	Body;Body	85	-0.0158402	-3.99967	-0.0237159	-0.00796457	0.000135924	0.999978	--
cg15672725	chr2	85838476	C2orf68;USP39;USP39;USP39	Body;TSS1500;TSS1500;Body	83	-0.0175442	-4.00074	-0.0262678	-0.00882054	0.000137672	0.999978	--
cg11157525	chr5	1378503			85	-0.0122952	-3.98924	-0.0184243	-0.00616615	0.000141039	0.999978	--
cg18598016	chr22	39641127	PDGFB	TSS200	80	-0.00765205	-3.99244	-0.011467	-0.00383708	0.000145512	0.999978	--
cg26987083	chr12	25422729			86	0.0132405	3.96868	0.00660713	0.0198738	0.00015049	0.999978	++
cg15339810	chr6	126277710	HINT3	TSS200	81	-0.0285225	-3.97635	-0.0427973	-0.0142477	0.000152602	0.999978	--
cg19411980	chr17	18056388	MYO15A	Body	86	-0.0187447	-3.96368	-0.0281474	-0.00934195	0.000153174	0.999978	--
cg05896042	chr19	11450090	RAB3D	5'UTR	86	-0.00112073	-3.96252	-0.00168308	-0.000558386	0.000153802	0.999978	--
cg19834134	chr7	82791675	PCLO;PCLO	1stExon;1stExon	84	-0.00188845	-3.96425	-0.00283592	-0.000940967	0.000155292	0.999978	--
cg21708468	chr21	43161947	RIPK4	Body	85	-0.013259	-3.96156	-0.0199148	-0.0066033	0.000155533	0.999978	--
cg02653834	chr6	108169834			83	-0.00374653	-3.95634	-0.00563035	-0.00186271	0.000160967	0.999978	--
cg00865505	chr12	56351272	PMEL;PMEL;PMEL	Body;Body;Body	84	-0.0150995	-3.94825	-0.022706	-0.00749303	0.000164278	0.999978	--
cg12670073	chr20	56287532	PMEPA1	TSS1500	86	-0.00807583	-3.93835	-0.0121529	-0.00399876	0.000167488	0.999978	--
cg07167493	chr1	85086352	LINC01461	Body	86	-0.0114378	-3.93469	-0.0172175	-0.00565807	0.000169662	0.999978	--
cg01986350	chr9	123639608	PHF19;PHF19;PHF19;PHF19	TSS200;TSS200;TSS200;Body	83	-0.000702125	-3.94126	-0.00105652	-0.000347733	0.000169707	0.999978	--
cg03114057	chr17	72362302	GPR142	TSS1500	86	-0.015139	-3.93276	-0.0227928	-0.00748525	0.000170814	0.999978	--
cg04898835	chr2	240444554			85	-0.0165287	-3.93479	-0.0248821	-0.00817523	0.000170892	0.999978	--
cg25009733	chr2	233886711			86	-0.0177806	-3.92686	-0.0267834	-0.00877784	0.0001744	0.999978	--
cg06123807	chr7	2761760			85	-0.00454219	-3.92722	-0.0068422	-0.00224218	0.000175497	0.999978	--
cg25278559	chr16	84546838			85	-0.0169535	-3.92693	-0.0255388	-0.0083682	0.000175673	0.999978	--
cg06931444	chr8	129874054			85	-0.0191929	-3.92308	-0.0289218	-0.00946403	0.000178061	0.999978	--
cg23583420	chr9	115913515	SLC31A2	Body	78	-0.00303033	-3.93915	-0.00456217	-0.00149849	0.000178391	0.999978	--
cg09159452	chr7	2609861	IQCE;IQCE	Body;Body	86	-0.0171242	-3.91826	-0.0258137	-0.00843475	0.000179746	0.999978	--
cg19620629	chr10	132007272			85	0.00820446	3.9194	0.00404172	0.0123672	0.00018037	0.999978	++
cg10198568	chr10	13750689	FRMD4A	Body	86	-0.0252137	-3.9143	-0.038021	-0.0124064	0.000182262	0.999978	--
cg07124969	chr16	88356689			86	-0.0189632	-3.90752	-0.0286123	-0.00931415	0.000186642	0.999978	--
cg06072822	chr13	113652069	MCF2L;MCF2L	Body;Body	86	-0.0122616	-3.90709	-0.0185014	-0.00602186	0.000186923	0.999978	--
cg01665174	chr8	119756156			79	-0.0242746	-3.91904	-0.0366059	-0.0119433	0.000189577	0.999978	--
cg09328046	chr4	1505324			85	-0.0191923	-3.90357	-0.0289695	-0.0094151	0.000190646	0.999978	--
cg15598952	chr16	12549470	SNX29	Body	84	0.00650913	3.90558	0.00319428	0.00982397	0.000190748	0.999978	++
cg22163183	chr16	84257546	KCNG4	Body	86	-0.0175125	-3.90092	-0.0264384	-0.00858649	0.000191011	0.999978	--
cg25013011	chr12	130389010	TMEM132D	TSS1500	83	-0.00452988	-3.9007	-0.00684007	-0.00221968	0.000195526	0.999978	--
cg04031424	chr4	152198350	PRSS48	1stExon	85	-0.0110889	-3.89068	-0.0167568	-0.00542114	0.000199428	0.999978	--
cg02957042	chr3	15201510			86	-0.0242761	-3.88847	-0.036689	-0.0118631	0.000199507	0.999978	--
cg05632718	chr20	49066839			86	0.0217961	3.88592	0.0106439	0.0329483	0.000201295	0.999978	++
cg01642168	chr19	55791471	HSPBP1;HSPBP1;HSPBP1	5'UTR;5'UTR;1stExon	75	0.00559507	3.90513	0.00274025	0.00844988	0.000206176	0.999978	++
cg15933527	chr12	51632360	DAZAP2;DAZAP2;DAZAP2;DAZAP2;DAZAP2;DAZAP2	TSS200;TSS200;TSS200;TSS200;TSS200;TSS200	86	-0.00161639	-3.87827	-0.00244506	-0.000787717	0.000206737	0.999978	--
cg25049287	chr16	4091786	ADCY9	Body	78	-0.0154684	-3.89506	-0.0233762	-0.00756053	0.000207734	0.999978	--
cg07233212	chr12	103601576			82	0.0113627	3.88407	0.00554196	0.0171835	0.000208774	0.999978	++
cg20715780	chr1	186814701	PLA2G4A	5'UTR	85	0.0165893	3.86836	0.00806123	0.0251173	0.000215541	0.999978	++
cg12813510	chr11	120765757	GRIK4;GRIK4;GRIK4	Body;Body;Body	85	-0.0212517	-3.86799	-0.0321777	-0.0103258	0.000215823	0.999978	--

## Sheet: S18
Supplementary Table 18. Within-pairs analysis, NTR children MZ twins, adjusted model (top 100 CpGs)
	CHR	Position	Gene	Gene region	Weight	Estimate	t	CI low	CI high	p-value	q-value	Direction
cg12760522	chr14	83513860			83	-0.013377	-5.18016	-0.0185141	-0.00823986	1.55653e-06	0.999944	--
cg27340584	chr6	100439050	MCHR2;MCHR2	5'UTR;5'UTR	83	-0.0145781	-5.00001	-0.0203782	-0.00877804	3.20226e-06	0.999944	--
cg02676199	chr14	23016309			84	-0.01336	-4.90299	-0.0187797	-0.00794036	4.62302e-06	0.999944	--
cg20104456	chr19	51568523	KLK13	TSS200	82	-0.00577216	-4.79723	-0.0081662	-0.00337812	7.22129e-06	0.999944	--
cg09296044	chr15	43477606	CCNDBP1;CCNDBP1;CCNDBP1;CCNDBP1;CCNDBP1	1stExon;Body;TSS1500;5'UTR;Body	65	-0.0830213	-4.70965	-0.118237	-0.0478055	1.3778e-05	0.999944	--
cg27437721	chr10	134420300	INPP5A	Body	82	-0.0143132	-4.59749	-0.0205076	-0.00811876	1.55593e-05	0.999944	--
cg20023049	chr12	7295542	CLSTN3	Body	83	-0.00808408	-4.57997	-0.0115954	-0.00457275	1.64084e-05	0.999944	--
cg18053628	chr13	103294959	TPP2	Body	84	-0.0302915	-4.51077	-0.0436481	-0.0169349	2.10637e-05	0.999944	--
cg25166820	chr11	68177631	LRP5	Body	78	-0.0184043	-4.51672	-0.026518	-0.0102905	2.2296e-05	0.999944	--
cg21850254	chr19	37959853	ZNF570	TSS200	83	-0.00390156	-4.48293	-0.0056329	-0.00217023	2.36873e-05	0.999944	--
cg25257189	chr10	61666537	CCDC6	TSS200	83	-0.00123239	-4.41988	-0.00178707	-0.00067771	3.00013e-05	0.999944	--
cg12330998	chr2	42722347	KCNG3;KCNG3	TSS1500;TSS1500	82	-0.00292755	-4.41673	-0.00424638	-0.00160872	3.07188e-05	0.999944	--
cg15211655	chr18	21977340	OSBPL1A	5'UTR	79	-0.00391616	-4.421	-0.00567966	-0.00215265	3.13851e-05	0.999944	--
cg08692733	chr10	112404738	RBM20	Body	84	-0.0263242	-4.36844	-0.0383096	-0.0143387	3.59265e-05	0.999944	--
cg05894673	chr19	42747827	GSK3A	TSS1500	77	-0.0045428	-4.3827	-0.00660722	-0.00247837	3.70852e-05	0.999944	--
cg23378869	chr11	44630741	CD82;CD82	Body;Body	84	0.00589329	4.35539	0.00320202	0.00858455	3.7711e-05	0.999944	++
cg11323295	chr2	19986514			84	-0.0309358	-4.30992	-0.0452121	-0.0166594	4.46245e-05	0.999944	--
cg05480623	chr6	32815009	TAP1	Body	84	-0.0202111	-4.30704	-0.0295445	-0.0108778	4.51021e-05	0.999944	--
cg02653834	chr6	108169834			82	-0.00437272	-4.29253	-0.00639958	-0.00234587	4.861e-05	0.999944	--
cg00463551	chr5	61708395	IPO11	TSS200	79	-0.00253049	-4.30027	-0.003702	-0.00135898	4.88891e-05	0.999944	--
cg21795544	chr5	42993440			84	-0.00574967	-4.26275	-0.00843242	-0.00306693	5.30862e-05	0.999944	--
cg07161172	chr15	71184870	LRRC49;THAP10	TSS200;TSS200	82	-0.00191696	-4.26387	-0.00281148	-0.00102243	5.39863e-05	0.999944	--
cg06766817	chr6	158515036	SYNJ2	Body	82	0.00715064	4.26173	0.0038122	0.0104891	5.44096e-05	0.999944	++
cg04371358	chr3	194808257	XXYLT1;XXYLT1	Body;Body	84	-0.020476	-4.24464	-0.0300707	-0.0108813	5.6729e-05	0.999944	--
cg24875634	chr14	75083434			83	-0.0134372	-4.23928	-0.0197427	-0.00713165	5.84428e-05	0.999944	--
cg23505015	chr15	57859418			83	-0.0194832	-4.21924	-0.0286692	-0.0102971	6.28718e-05	0.999944	--
cg21142153	chr1	78444553	FUBP1	Body	76	-0.00478836	-4.23264	-0.00704201	-0.00253471	6.46895e-05	0.999944	--
cg06931444	chr8	129874054			83	-0.0206921	-4.21074	-0.0304679	-0.0109164	6.48457e-05	0.999944	--
cg23124630	chr1	51208502	FAF1	Body	84	-0.0179343	-4.19911	-0.0264291	-0.00943948	6.69836e-05	0.999944	--
cg11157525	chr5	1378503			83	-0.0130019	-4.18082	-0.0191885	-0.00681533	7.22857e-05	0.999944	--
cg08763169	chr12	30990639			83	0.00780026	4.18059	0.00408853	0.011512	7.23449e-05	0.999944	++
cg10088477	chr19	36182907			84	-0.016715	-4.15338	-0.0247195	-0.0087106	7.90682e-05	0.999944	--
cg07167493	chr1	85086352	LINC01461	Body	84	-0.0120845	-4.12935	-0.0179052	-0.00626385	8.62351e-05	0.999944	--
cg25960044	chr4	103656296	MANBA	Body	83	-0.0205633	-4.11229	-0.0305108	-0.0106158	9.25425e-05	0.999944	--
cg18216046	chr9	73484191	TRPM3;TRPM3;TRPM3;TRPM3;TRPM3;TRPM3;TRPM3;TRPM3;TRPM3	TSS1500;TSS1500;TSS1500;TSS1500;TSS1500;TSS1500;TSS1500;TSS1500;Body	83	-0.0277394	-4.10822	-0.0411716	-0.0143072	9.3906e-05	0.999944	--
cg07534157	chr20	3669782	SIGLEC1;SIGLEC1	ExonBnd;Body	84	-0.0133301	-4.10394	-0.0197904	-0.00686969	9.44925e-05	0.999944	--
cg07322402	chr15	66393410	MEGF11	Body	83	-0.0139045	-4.09985	-0.0206513	-0.00715782	9.67635e-05	0.999944	--
cg15339810	chr6	126277710	HINT3	TSS200	77	-0.0305686	-4.10179	-0.0454116	-0.0157257	0.00010194	0.999944	--
cg00865505	chr12	56351272	PMEL;PMEL;PMEL	Body;Body;Body	82	-0.0157338	-4.08361	-0.0233999	-0.00806771	0.000103498	0.999944	--
cg15996950	chr13	112282703			84	0.0126843	4.05631	0.00646473	0.0189039	0.000112056	0.999944	++
cg26676468	chr5	112539223	MCC;MCC	Body;Body	84	-0.0358104	-4.03752	-0.0534512	-0.0181695	0.000119818	0.999944	--
cg09713125	chr7	45077876	CCM2;CCM2;CCM2;CCM2;CCM2	Body;Body;Body;Body;Body	82	-0.014056	-4.04042	-0.0209778	-0.00713417	0.00012068	0.999944	--
cg12222906	chr2	20738909			82	-0.0194647	-4.03953	-0.0290521	-0.00987727	0.000121063	0.999944	--
cg06177967	chr1	27332971	FAM46B	Body	83	-0.00607987	-4.03698	-0.00907587	-0.00308387	0.000121086	0.999944	--
cg12670073	chr20	56287532	PMEPA1	TSS1500	84	-0.00842384	-4.02968	-0.0125817	-0.00426603	0.000123202	0.999944	--
cg17052783	chr17	1814742			79	0.00800929	4.04096	0.00406338	0.0119552	0.000123838	0.999944	++
cg00804324	chr21	44490289	CBS;CBS;CBS	Body;Body;Body	83	-0.028154	-4.0284	-0.0420571	-0.0142509	0.000124832	0.999944	--
cg16863920	chr14	24836447	NFATC4;NFATC4;NFATC4;NFATC4	TSS1500;TSS1500;Body;Body	81	-0.00268725	-4.01759	-0.00401834	-0.00135615	0.000132004	0.999944	--
cg25579477	chr7	151496334	PRKAG2;PRKAG2	5'UTR;Body	84	-0.0207994	-4.00988	-0.0311162	-0.0104826	0.000132173	0.999944	--
cg23583420	chr9	115913515	SLC31A2	Body	76	-0.00314661	-4.03061	-0.0047018	-0.00159142	0.000132278	0.999944	--
cg15672725	chr2	85838476	C2orf68;USP39;USP39;USP39	Body;TSS1500;TSS1500;Body	81	-0.0176157	-4.01509	-0.0263469	-0.00888456	0.000133174	0.999944	--
cg11493038	chr5	158583464			83	0.0265473	4.00789	0.0133705	0.039724	0.000134237	0.999944	++
cg08976342	chr10	31318135	ZNF438;ZNF438;ZNF438;ZNF438;ZNF438;ZNF438;ZNF438	5'UTR;5'UTR;5'UTR;5'UTR;5'UTR;5'UTR;Body	84	-0.0141795	-4.0054	-0.0212206	-0.0071384	0.000134286	0.999944	--
cg02045559	chr21	43540621	UMODL1;UMODL1;UMODL1;UMODL1	Body;Body;Body;Body	70	-0.0305422	-4.04396	-0.0456092	-0.0154753	0.000134907	0.999944	--
cg17406148	chr7	87257356	RUNDC3B;RUNDC3B;ABCB1;RUNDC3B	TSS1500;TSS1500;5'UTR;TSS1500	83	-0.00228	-4.0029	-0.00341309	-0.00114691	0.000136623	0.999944	--
cg06335372	chr3	42806748	CCDC13	5'UTR	83	-0.0172209	-4.00216	-0.0257807	-0.00866104	0.000136983	0.999944	--
cg14263489	chr11	62378600	EML3;EML3;EML3	Body;Body;Body	81	-0.0161515	-4.00574	-0.0241756	-0.00812739	0.000137632	0.999944	--
cg19620629	chr10	132007272			84	0.00855541	3.99377	0.00429468	0.0128161	0.000139932	0.999944	++
cg11498487	chr8	131309621	ASAP1IT1;ASAP1	TSS1500;Body	84	-0.0155201	-3.99295	-0.023251	-0.00778929	0.000140335	0.999944	--
cg12043561	chr19	4152810	CREB3L3;CREB3L3;CREB3L3;CREB3L3	TSS1500;TSS1500;TSS1500;TSS1500	83	-0.0175854	-3.99385	-0.0263447	-0.00882621	0.000141062	0.999944	--
cg25029444	chr10	47623455	ANTXRLP1;ANTXRLP1	Body;Body	83	-0.0180486	-3.99202	-0.0270427	-0.00905457	0.000141977	0.999944	--
cg16240683	chr1	23697258	C1orf213;C1orf213;C1orf213;ZNF436	3'UTR;Body;1stExon;TSS1500	83	-0.0232003	-3.98758	-0.0347745	-0.0116262	0.000144217	0.999944	--
cg04819351	chr15	36872220	C15orf41	Body	84	-0.0198927	-3.97912	-0.0298361	-0.00994935	0.000147363	0.999944	--
cg02957042	chr3	15201510			84	-0.0252837	-3.97761	-0.0379266	-0.0126409	0.000148151	0.999944	--
cg21151950	chr7	1718485			80	-0.0056008	-3.98454	-0.00839865	-0.00280296	0.000149596	0.999944	--
cg09361491	chr1	47070176	MKNK1;MKNK1;MKNK1;MKNK1;MKNK1	TSS1500;TSS1500;TSS1500;TSS1500;TSS1500	83	-0.00396992	-3.97662	-0.00595589	-0.00198395	0.000149893	0.999944	--
cg01559787	chr19	19416804	SF4	Body	83	-0.011051	-3.97538	-0.0165811	-0.00552098	0.000150549	0.999944	--
cg17154057	chr2	42722051	KCNG3;KCNG3	TSS1500;TSS1500	82	-0.00211831	-3.97405	-0.00317888	-0.00105773	0.000152527	0.999944	--
cg05204315	chr10	129245728	DOCK1	Body	82	0.00938487	3.97187	0.00468357	0.0140862	0.000153697	0.999944	++
cg19888509	chr12	125145641			80	-0.0106534	-3.97575	-0.015987	-0.0053198	0.00015427	0.999944	--
cg14125542	chr2	16796185	FAM49A	5'UTR	84	-0.0169669	-3.96595	-0.0254759	-0.00845784	0.000154362	0.999944	--
cg14212442	chr13	44816973			84	-0.00953765	-3.96594	-0.0143209	-0.00475442	0.000154368	0.999944	--
cg25013011	chr12	130389010	TMEM132D	TSS1500	81	-0.00471922	-3.9728	-0.00708319	-0.00235526	0.000154515	0.999944	--
cg09379385	chr6	27774865	HIST1H2AI	TSS1500	83	-0.00495988	-3.96022	-0.00745135	-0.00246841	0.000158788	0.999944	--
cg15405028	chr17	20945555	USP22	Body	81	-0.00317906	-3.95418	-0.00477902	-0.0015791	0.000164912	0.999944	--
cg15806732	chr1	67886406	SERBP1;SERBP1;SERBP1;SERBP1	Body;Body;Body;Body	84	-0.0239955	-3.94192	-0.0361028	-0.0118882	0.000167969	0.999944	--
cg02337166	chr17	38257303	NR1D1	TSS1500	79	-0.0037942	-3.95184	-0.00570563	-0.00188277	0.000169182	0.999944	--
cg10841124	chr5	433274	AHRR	Body	83	-0.0170579	-3.93474	-0.0256821	-0.00843382	0.000173624	0.999944	--
cg14375111	chr3	14165186	TMEM43;CHCHD4;CHCHD4	TSS1500;Body;5'UTR	84	-0.0196591	-3.92828	-0.0296129	-0.00970535	0.000176197	0.999944	--
cg06072822	chr13	113652069	MCF2L;MCF2L	Body;Body	84	-0.0125883	-3.9271	-0.0189639	-0.00621271	0.000176924	0.999944	--
cg24110768	chr12	58159478	CYP27B1	Body	81	-0.00731199	-3.93074	-0.0110139	-0.00361007	0.000178964	0.999944	--
cg25975192	chr4	897587	GAK	Body	84	-0.0193706	-3.91394	-0.0292142	-0.00952696	0.000185261	0.999944	--
cg04136449	chr1	221920271			84	0.00850216	3.91368	0.0041813	0.012823	0.000185428	0.999944	++
cg20715780	chr1	186814701	PLA2G4A	5'UTR	83	0.0169633	3.91266	0.00833861	0.0255879	0.000187545	0.999944	++
cg09159452	chr7	2609861	IQCE;IQCE	Body;Body	84	-0.0171624	-3.90913	-0.0258946	-0.00843019	0.0001884	0.999944	--
cg18598016	chr22	39641127	PDGFB	TSS200	78	-0.00770661	-3.92249	-0.0116189	-0.00379435	0.000188975	0.999944	--
cg14122138	chr17	36719737	SRCIN1	Body	78	0.0106987	3.91657	0.0052593	0.0161381	0.000192883	0.999944	++
cg06443042	chr11	31327199	DCDC1	Body	83	-0.00987353	-3.90378	-0.014905	-0.00484211	0.000193436	0.999944	--
cg04755227	chr16	88449254			84	-0.011771	-3.8991	-0.0177755	-0.00576652	0.000195112	0.999944	--
cg16486836	chr17	1456888	PITPNA	Body	83	-0.0264198	-3.90085	-0.0398932	-0.0129465	0.00019542	0.999944	--
cg14257107	chr1	145510921	GNRHR2;RBM8A	Body;3'UTR	84	-0.0212949	-3.89696	-0.0321636	-0.0104263	0.000196571	0.999944	--
cg13966883	chr4	185940549	HELT	Body	78	-0.00338478	-3.90599	-0.00511032	-0.00165923	0.000200054	0.999944	--
cg18655113	chr17	78152199	CARD14;CARD14;CARD14	TSS200;TSS200;Body	83	-0.00238528	-3.89409	-0.00360382	-0.00116675	0.000200072	0.999944	--
cg13681853	chr17	17766145	TOM1L2;TOM1L2;TOM1L2;TOM1L2;TOM1L2;TOM1L2;TOM1L2;TOM1L2;TOM1L2;TOM1L2;TOM1L2;TOM1L2	ExonBnd;ExonBnd;ExonBnd;ExonBnd;ExonBnd;ExonBnd;Body;Body;Body;Body;Body;Body	84	-0.0115991	-3.88874	-0.0175316	-0.00566654	0.000202282	0.999944	--
cg03370752	chr11	61136373	TMEM138;TMEM138	3'UTR;Body	82	-0.032506	-3.89161	-0.0491255	-0.0158864	0.000203388	0.999944	--
cg19411980	chr17	18056388	MYO15A	Body	84	-0.0189011	-3.88526	-0.028577	-0.00922517	0.000204744	0.999944	--
cg05632718	chr20	49066839			84	0.0220116	3.87915	0.0107256	0.0332976	0.000209144	0.999944	++
cg15598952	chr16	12549470	SNX29	Body	82	0.00660287	3.88305	0.00321954	0.00998621	0.000209514	0.999944	++
cg16614500	chr11	694704	TMEM80;DEAF1;TMEM80	TSS1500;Body;TSS1500	78	-0.00814796	-3.89248	-0.0123162	-0.00397975	0.000209585	0.999944	--
cg04884798	chr14	24791720	ADCY4	Body	84	-0.013173	-3.87193	-0.0199398	-0.00640619	0.000214455	0.999944	--

## Sheet: S19
Supplementary Table 19. EWAS of left-handedness, ALSPAC at birth, basic model (top 100 CpGs)
	CHR	Position	Gene	Gene region	Weight	β	SE	p-value	q-value	Direction
cg20157693	1	1419379	ATAD3B	Body	697	-0.0163213	0.00335215	1.40257e-06	0.661265	--
cg18531146	11	12715649	TEAD1	5'UTR	694	-0.00448783	0.00097578	5.07887e-06	1	--
cg20126878	20	57464571	GNAS;GNAS;GNAS;GNAS	3'UTR;Body;3'UTR;Body	703	0.0239832	0.00536203	9.06168e-06	1	++
cg10753298	10	98807172	SLIT1	Body	703	-0.0322972	0.00722092	9.06419e-06	1	--
cg01395898	5	68629755			691	-0.0220964	0.00502746	1.2894e-05	1	--
cg14071869	6	41624407			701	0.0187724	0.00428886	1.39508e-05	1	++
cg17454831	2	66667073	MEIS1	Body	703	-0.0221365	0.0051213	1.77639e-05	1	--
cg13187967	11	13485012	BTBD10	TSS200	697	0.00326452	0.000776921	3.00754e-05	1	++
cg08668281	13	25726655			703	0.0497902	0.0119725	3.61482e-05	1	++
cg07651452	2	240323957	HDAC4	TSS1500	697	-0.0101262	0.00244505	3.89331e-05	1	--
cg27311476	18	77794419	C18orf22;C18orf22	5'UTR;1stExon	699	0.00158562	0.00038443	4.18139e-05	1	++
cg14138610	19	58338986	FKBP1AP1	TSS200	703	-0.0193569	0.00472092	4.63196e-05	1	--
cg25629326	8	95274342	GEM;GEM;GEM	5'UTR;5'UTR;1stExon	698	0.00752278	0.00184904	5.29736e-05	1	++
cg21534486	5	43557482	PAIP1;PAIP1;PAIP1;PAIP1	5'UTR;TSS1500;1stExon;TSS1500	699	0.00110094	0.000270978	5.42296e-05	1	++
cg02906827	16	84217575	TAF1C;TAF1C	5'UTR;Body	690	-0.0173558	0.00428396	5.69819e-05	1	--
cg20017797	14	24563410	PCK2;PCK2	TSS200;TSS200	700	0.00135544	0.000334737	5.73819e-05	1	++
cg09044296	5	176739296	MXD3;MXD3	TSS200;TSS200	698	0.00990424	0.00245724	6.20314e-05	1	++
cg01288184	18	20811408	CABLES1;CABLES1;CABLES1	Body;Body;Body	703	-0.00997857	0.00248487	6.59311e-05	1	--
cg05068146	1	6507693	ESPN	Body	698	0.00604949	0.00150766	6.68709e-05	1	++
cg03803811	16	54962045			689	0.00731491	0.00182477	6.8034e-05	1	++
cg06807726	18	74090695	ZNF516	Body	700	-0.0229755	0.00574628	7.08827e-05	1	--
cg00043095	2	223289277	SGPP2	TSS200	699	0.00194792	0.000489502	7.66397e-05	1	++
cg27551227	7	154877217	HTR5A	3'UTR	701	-0.0296168	0.00744453	7.69504e-05	1	--
cg01459116	15	41954072	MGA;MGA	5'UTR;5'UTR	700	-0.00754761	0.00189943	7.84645e-05	1	--
cg09824615	14	77600014	ZDHHC22	3'UTR	703	0.0292857	0.00737499	7.92979e-05	1	++
cg00067414	6	151188081	MTHFD1L	Body	687	0.00229452	0.000579462	8.32232e-05	1	++
cg15656901	18	67873348	RTTN	TSS1500	694	0.00240545	0.000607683	8.35952e-05	1	++
cg08723131	20	55043694	C20orf43;C20orf43	1stExon;5'UTR	689	0.0030611	0.000774174	8.51667e-05	1	++
cg16513467	10	28822500	WAC;WAC;WAC;WAC;WAC	1stExon;5'UTR;1stExon;5'UTR;Body	700	0.00629872	0.00159339	8.53721e-05	1	++
cg14365143	21	48088046			699	0.00511981	0.00129568	8.5935e-05	1	++
cg26332285	10	134915746	GPR123	Body	702	-0.0253625	0.00642528	8.73651e-05	1	--
cg07174177	17	46988726	UBE2Z	Body	701	0.0280446	0.00710578	8.75794e-05	1	++
cg26959053	7	129073870	FAM40B;FAM40B	TSS1500;TSS1500	700	-0.00315906	0.000800541	8.77963e-05	1	--
cg01274643	11	1283946			604	0.00251328	0.00064212	0.000101661	1	++
cg17468569	1	162041135	NOS1AP;NOS1AP	Body;Body	702	-0.0188915	0.00485147	0.000108461	1	--
cg04747678	19	45805662	MARK4	Body	696	-0.0285277	0.00733331	0.000110241	1	--
cg24884572	19	58661833	ZNF329	5'UTR	696	0.00124154	0.000319559	0.00011248	1	++
cg17819489	7	50862067	GRB10	TSS1500	686	0.0177793	0.00459063	0.000118302	1	++
cg03144446	7	20366667			703	-0.0342825	0.00886146	0.000120045	1	--
cg12178465	12	57405251	TAC3	3'UTR	697	0.0198591	0.00513439	0.00012056	1	++
cg15708382	8	102903909	NCALD;NCALD;NCALD;NCALD;NCALD;NCALD;NCALD	5'UTR;5'UTR;5'UTR;5'UTR;5'UTR;5'UTR;5'UTR	701	-0.00395884	0.00102541	0.000123968	1	--
cg26762050	16	67022599	CES8	TSS200	695	-0.0184977	0.0048036	0.000129111	1	--
cg21364719	18	72919061	ZADH2	Body	700	-0.0159067	0.00413547	0.000131304	1	--
cg06589507	5	179234594	SQSTM1;SQSTM1;MGAT4B	5'UTR;5'UTR;TSS1500	693	0.0124614	0.00323986	0.000131502	1	++
cg22469274	7	27187553	HOXA6	TSS200	618	0.00192396	0.000502163	0.000141155	1	++
cg15557486	10	135207703	MTG1;MTG1	1stExon;5'UTR	702	0.00151648	0.000396191	0.000141459	1	++
cg10600851	12	132650493			703	0.0336955	0.0088035	0.00014151	1	++
cg15911651	3	33427876	FBXL2	3'UTR	703	-0.023436	0.00612493	0.000142177	1	--
cg16692781	19	21937852	ZNF100	Body	702	-0.0136128	0.00356253	0.000145185	1	--
cg01780164	14	70343734			699	-0.0215264	0.00563883	0.000147307	1	--
cg22627826	19	1240265	ATP5D;ATP5D	TSS1500;TSS1500	693	0.000868836	0.000228088	0.000152358	1	++
cg08824335	9	38622360	C9orf122	Body	702	-0.0085024	0.00224048	0.000161031	1	--
cg12177010	15	44083728	SERF2	TSS1500	684	-0.012768	0.00336835	0.000164193	1	--
cg10129665	12	54133618			694	0.0121344	0.00320535	0.000167175	1	++
cg25017620	1	247802802			694	0.0249876	0.00660246	0.000167881	1	++
cg25049374	6	27560507			694	-0.0126138	0.00333495	0.000169396	1	--
cg08004919	12	56652272	ANKRD52	TSS200	699	0.00147392	0.000389815	0.000170124	1	++
cg25519033	11	695585	TMEM80;TMEM80;DEAF1;DEAF1	TSS200;TSS200;5'UTR;1stExon	699	0.000835827	0.000221109	0.000170727	1	++
cg20570458	3	124069933	KALRN;KALRN	Body;Body	696	0.0236758	0.00626797	0.000172746	1	++
cg16794406	11	46143014	PHF21A;PHF21A	TSS200;TSS200	702	0.00172847	0.000458052	0.000175178	1	++
cg03761979	4	57843892	C4orf14;POLR2B	TSS200;TSS1500	676	0.00307446	0.000814962	0.000176454	1	++
cg11222836	8	142203937	DENND3	Body	701	-0.0243465	0.00645857	0.000177884	1	--
cg24507519	7	2578674	C7orf27	Body	699	0.0289142	0.00768019	0.000181355	1	++
cg22586996	5	158523907	EBF1	Body	699	-0.0334977	0.00892009	0.000188202	1	--
cg16665614	15	61302584	RORA	Body	703	0.0292466	0.00779299	0.000189865	1	++
cg01705052	16	12996234	SHISA9;SHISA9	1stExon;1stExon	699	0.00132952	0.000354389	0.000190961	1	++
cg25449484	5	92929372	NR2F1	Body	691	0.00146838	0.000391633	0.000192798	1	++
cg26810816	20	708630			691	0.0106615	0.00284438	0.000193631	1	++
cg01800614	6	29719096	IFITM4P	TSS200	687	-0.0143836	0.00383866	0.000194676	1	--
cg19337241	10	102536137	PAX2;PAX2;PAX2;PAX2;PAX2	Body;Body;Body;Body;Body	698	0.0163749	0.00437608	0.000198338	1	++
cg16720616	2	149866889	KIF5C	Body	702	-0.0335564	0.00898339	0.000203341	1	--
cg12038521	19	2111714	AP3D1;AP3D1	Body;Body	703	-0.0139277	0.00373824	0.000211097	1	--
cg23791813	20	39317833	MAFB;MAFB	5'UTR;1stExon	702	0.00608925	0.00163734	0.000216709	1	++
cg08457169	2	242805904			703	0.0153216	0.00412145	0.000217933	1	++
cg00959636	6	134499464	SGK1;SGK1	Body;TSS1500	690	-0.00342293	0.00092196	0.00022241	1	--
cg05158566	1	171711606	VAMP4	TSS1500	694	0.00319328	0.000860136	0.000222422	1	++
cg26109568	2	105697685	MRPS9	Body	703	0.0322898	0.00870157	0.000223677	1	++
cg03562531	3	53764604	CACNA1D;CACNA1D;CACNA1D	Body;Body;Body	700	0.0209974	0.00565974	0.000224488	1	++
cg07908508	19	35417702	ZNF30;ZNF30;ZNF30;ZNF30	TSS200;TSS200;TSS200;TSS200	696	-0.00488968	0.00131842	0.000225645	1	--
cg21205320	2	3648280	COLEC11;COLEC11	5'UTR;5'UTR	700	-0.0299036	0.00806658	0.000226985	1	--
cg24361098	2	60748951	BCL11A;BCL11A;BCL11A	Body;Body;Body	703	0.0300316	0.00811178	0.000231218	1	++
cg17161421	6	32120077	PRRT1;PPT2	TSS1500;TSS1500	701	-0.0129574	0.00350114	0.000232451	1	--
cg24604604	1	115213147	DENND2C	TSS1500	681	-0.00617292	0.00166958	0.000236275	1	--
cg10563131	22	50636443	TRABD	Body	701	-0.0374906	0.0101496	0.000238933	1	--
cg14660726	1	221047545			699	0.0141249	0.00382517	0.000240069	1	++
cg13634501	15	60690026	ANXA2;ANXA2;ANXA2;ANXA2	5'UTR;5'UTR;Body;5'UTR	700	0.00453854	0.00122922	0.000240413	1	++
cg26675329	2	103033753	IL18RAP	TSS1500	702	-0.0199383	0.00540282	0.000242093	1	--
cg14493094	4	132896579			703	-0.0669539	0.0181433	0.000242117	1	--
cg15002713	2	19092241			702	0.0177384	0.0048075	0.000242656	1	++
cg20536983	8	13134166	DLC1	Body	696	0.00133326	0.000361428	0.000243651	1	++
cg25621096	1	151032116	CDC42SE1;CDC42SE1;CDC42SE1;MLLT11;CDC42SE1	5'UTR;1stExon;5'UTR;TSS200;1stExon	698	0.00915179	0.00248181	0.000244819	1	++
cg02250071	6	150465049	PPP1R14C	Body	690	0.00457979	0.0012438	0.000250238	1	++
cg20046040	8	121135930	COL14A1	TSS1500	653	0.004501	0.00122361	0.000254933	1	++
cg12051027	1	48931095	SPATA6	Body	703	0.0245418	0.0066798	0.000257739	1	++
cg22004069	19	5585648			702	0.0204587	0.00557231	0.000260274	1	++
cg05710090	12	34442705			703	0.0349129	0.0095119	0.000261301	1	++
cg15796978	2	48982509	LHCGR	Body	698	0.0146248	0.00398497	0.000261903	1	++
cg08020574	16	89557182	ANKRD11	TSS1500	698	0.00162552	0.000443076	0.000263189	1	++
cg00859314	19	46147548			700	0.0317239	0.00865715	0.000267437	1	++
cg20731798	11	36616365	C11orf74;RAG2	5'UTR;5'UTR	697	-0.00331421	0.000904731	0.000268843	1	--

## Sheet: S20
Supplementary Table 20. EWAS of left-handedness, ALSPAC at birth, adjusted model (top 100 CpGs)
	CHR	Position	Gene	Gene region	Weight	β	SE	p-value	q-value	Direction
cg20157693	1	1419379	ATAD3B	Body	682	-0.0172132	0.00347694	9.43583e-07	0.444866	--
cg18531146	11	12715649	TEAD1	5'UTR	680	-0.00442455	0.000963086	5.22311e-06	1	--
cg01395898	5	68629755			676	-0.0229207	0.00508482	7.78636e-06	1	--
cg14138610	19	58338986	FKBP1AP1	TSS200	688	-0.0210693	0.00480057	1.32735e-05	1	--
cg16665614	15	61302584	RORA	Body	688	0.0345101	0.00795986	1.68276e-05	1	++
cg10753298	10	98807172	SLIT1	Body	688	-0.0319159	0.00736586	1.70193e-05	1	--
cg26823149	15	81673470			688	0.0334667	0.00780818	2.09112e-05	1	++
cg20126878	20	57464571	GNAS;GNAS;GNAS;GNAS	3'UTR;Body;3'UTR;Body	688	0.0228202	0.0053456	2.25381e-05	1	++
cg09824615	14	77600014	ZDHHC22	3'UTR	688	0.0323339	0.00757518	2.25938e-05	1	++
cg07174177	17	46988726	UBE2Z	Body	686	0.0304058	0.00720154	2.76293e-05	1	++
cg03803811	16	54962045			674	0.00779986	0.00186176	3.18709e-05	1	++
cg02906827	16	84217575	TAF1C;TAF1C	5'UTR;Body	675	-0.017921	0.00430489	3.56998e-05	1	--
cg17454831	2	66667073	MEIS1	Body	688	-0.0216333	0.00522193	3.88019e-05	1	--
cg04747678	19	45805662	MARK4	Body	681	-0.0308543	0.00746035	4.00269e-05	1	--
cg24507519	7	2578674	C7orf27	Body	684	0.0321058	0.00776345	4.00484e-05	1	++
cg24884572	19	58661833	ZNF329	5'UTR	681	0.00133192	0.000322971	4.20833e-05	1	++
cg11316517	5	72666838			684	0.0321553	0.00780701	4.29902e-05	1	++
cg06807726	18	74090695	ZNF516	Body	685	-0.0241238	0.0058889	4.72206e-05	1	--
cg12178465	12	57405251	TAC3	3'UTR	682	0.0203479	0.00498692	5.05811e-05	1	++
cg15656901	18	67873348	RTTN	TSS1500	680	0.0025097	0.000615119	5.0649e-05	1	++
cg09044296	5	176739296	MXD3;MXD3	TSS200;TSS200	683	0.0102352	0.0025099	5.1069e-05	1	++
cg26959053	7	129073870	FAM40B;FAM40B	TSS1500;TSS1500	685	-0.0032892	0.000812294	5.75448e-05	1	--
cg25449484	5	92929372	NR2F1	Body	676	0.00160933	0.000398763	6.09542e-05	1	++
cg26572488	7	132299669	PLXNA4	5'UTR	679	0.00342945	0.000853929	6.6114e-05	1	++
cg00067414	6	151188081	MTHFD1L	Body	674	0.00236062	0.000590339	7.10815e-05	1	++
cg06589507	5	179234594	SQSTM1;SQSTM1;MGAT4B	5'UTR;5'UTR;TSS1500	678	0.0129741	0.00324747	7.20972e-05	1	++
cg27311476	18	77794419	C18orf22;C18orf22	5'UTR;1stExon	684	0.00156406	0.000391828	7.3055e-05	1	++
cg15825264	17	655740	ELP2P;GEMIN4	TSS200;TSS1500	673	0.00290907	0.000729003	7.35567e-05	1	++
cg12177010	15	44083728	SERF2	TSS1500	669	-0.013565	0.00340093	7.41755e-05	1	--
cg25017620	1	247802802			681	0.0262895	0.0066765	9.11978e-05	1	++
cg01274643	11	1283946			591	0.00256276	0.000651702	9.4668e-05	1	++
cg04158730	1	242011433	EXO1;EXO1;EXO1	TSS1500;TSS200;TSS1500	687	0.00282527	0.000723205	0.000103324	1	++
cg01780164	14	70343734			684	-0.0222169	0.00569827	0.000106646	1	--
cg22586996	5	158523907	EBF1	Body	684	-0.035584	0.00915279	0.000111523	1	--
cg26332285	10	134915746	GPR123	Body	687	-0.0257767	0.00663045	0.000111541	1	--
cg13634501	15	60690026	ANXA2;ANXA2;ANXA2;ANXA2	5'UTR;5'UTR;Body;5'UTR	685	0.00497166	0.00127992	0.000113058	1	++
cg20706316	1	8398600	SLC45A1	Body	667	-0.00438802	0.00112977	0.000113533	1	--
cg07731455	3	14220336	LSM3;XPC;XPC;XPC;LSM3	1stExon;TSS200;TSS200;TSS200;5'UTR	680	0.00236203	0.00060918	0.000116345	1	++
cg14071869	6	41624407			686	0.0168935	0.00435733	0.000116412	1	++
cg23728669	11	63258734	HRASLS5;HRASLS5;HRASLS5	TSS200;TSS200;TSS200	673	0.00228107	0.000590092	0.000122094	1	++
cg08004919	12	56652272	ANKRD52	TSS200	684	0.00151908	0.000393123	0.000122623	1	++
cg08668281	13	25726655			688	0.0471693	0.0122259	0.000125535	1	++
cg08627768	10	11511100	USP6NL;USP6NL	Body;Body	688	0.0309867	0.00804815	0.000129595	1	++
cg14951193	19	4535211	PLIN5	TSS200	682	0.00146983	0.000382311	0.000132627	1	++
cg13972661	9	99776416	HIATL2	TSS1500	688	0.0335428	0.00875371	0.000139416	1	++
cg25060765	6	7680990			688	-0.0251128	0.00655734	0.000140595	1	--
cg24695972	1	117113752	CD58;CD58;CD58	TSS200;TSS200;TSS200	685	0.00905416	0.00236412	0.000140595	1	++
cg21205320	2	3648280	COLEC11;COLEC11	5'UTR;5'UTR	685	-0.0315246	0.00824632	0.000144527	1	--
cg20017797	14	24563410	PCK2;PCK2	TSS200;TSS200	685	0.00130351	0.000341664	0.000149004	1	++
cg00783952	10	134999606	KNDC1	Body	686	0.0331158	0.00868574	0.000150477	1	++
cg11222836	8	142203937	DENND3	Body	686	-0.0247988	0.00651447	0.000154055	1	--
cg17468569	1	162041135	NOS1AP;NOS1AP	Body;Body	687	-0.0188769	0.00495962	0.000154399	1	--
cg05068146	1	6507693	ESPN	Body	683	0.00572423	0.00150634	0.000158209	1	++
cg06259996	5	92921023	NR2F1	1stExon	673	-0.00612427	0.00161246	0.000159686	1	--
cg00348621	5	90680542	LOC100129716;ARRDC3	Body;TSS1500	688	-0.0166372	0.00438154	0.000159978	1	--
cg24604604	1	115213147	DENND2C	TSS1500	666	-0.00640175	0.00168843	0.000164017	1	--
cg27582527	1	15734285			688	-0.0275732	0.00728546	0.000167996	1	--
cg26810816	20	708630			676	0.0110284	0.00291466	0.000168879	1	++
cg23180938	5	115152485	CDO1	TSS200	682	0.00137713	0.000365197	0.000177467	1	++
cg01288184	18	20811408	CABLES1;CABLES1;CABLES1	Body;Body;Body	688	-0.00942538	0.00250127	0.000179211	1	--
cg16692781	19	21937852	ZNF100	Body	687	-0.0136676	0.00363242	0.000183172	1	--
cg01300852	6	166955885	RPS6KA2;RPS6KA2	Body;Body	667	-0.0118268	0.00314315	0.000183635	1	--
cg05710090	12	34442705			688	0.0361189	0.00964036	0.000195002	1	++
cg11691589	7	116165612	CAV1	Body	685	-0.00779567	0.002081	0.000195464	1	--
cg07651452	2	240323957	HDAC4	TSS1500	682	-0.00961739	0.00256807	0.000196412	1	--
cg19384106	6	33289202	DAXX;DAXX;DAXX;DAXX	Body;Body;Body;Body	676	-0.0142595	0.00380859	0.000197298	1	--
cg00297741	10	1198879			679	-0.0107961	0.00288961	0.000203335	1	--
cg25358410	9	95055763	IARS;IARS;SNORA84;IARS	5'UTR;5'UTR;TSS1500;1stExon	684	0.00550509	0.00147543	0.000207201	1	++
cg23791813	20	39317833	MAFB;MAFB	5'UTR;1stExon	687	0.00624891	0.00167926	0.000215289	1	++
cg05428912	6	42989345	C6orf153	TSS200	672	0.00301826	0.000811754	0.000218249	1	++
cg22459320	17	62658827	SMURF2	TSS1500	680	0.00675796	0.00181925	0.000221	1	++
cg10928931	7	144051247	ARHGEF5	TSS1500	687	0.0165021	0.00445035	0.00022656	1	++
cg20536983	8	13134166	DLC1	Body	681	0.00137839	0.000371743	0.000226842	1	++
cg26762050	16	67022599	CES8	TSS200	680	-0.0183119	0.00494128	0.00022864	1	--
cg01862172	6	147829799	SAMD5	TSS1500	683	-0.00150364	0.00040586	0.000229511	1	--
cg14365143	21	48088046			684	0.0048752	0.00131709	0.000232461	1	++
cg11427028	4	188391387			671	-0.019297	0.00521391	0.000233225	1	--
cg25629326	8	95274342	GEM;GEM;GEM	5'UTR;5'UTR;1stExon	683	0.00693088	0.00187292	0.000233301	1	++
cg03677069	10	88718317	SNCG;SNCG;MMRN2	1stExon;5'UTR;TSS1500	688	-0.0394445	0.0106807	0.000240029	1	--
cg07912453	15	99551585	LOC145814	TSS1500	688	-0.0123376	0.00334247	0.000241772	1	--
cg16068401	18	54317872	WDR7;WDR7	TSS1500;TSS1500	685	-0.00932591	0.00253099	0.000247969	1	--
cg20570458	3	124069933	KALRN;KALRN	Body;Body	681	0.0234854	0.00638231	0.000252827	1	++
cg08824335	9	38622360	C9orf122	Body	687	-0.00849897	0.00231213	0.000256503	1	--
cg17162808	20	33266296	PIGU	TSS1500	688	0.0274849	0.0074813	0.000258448	1	++
cg19939503	1	223919461	CAPN2;CAPN2	Body;Body	676	-0.0115394	0.00314076	0.000258556	1	--
cg14272860	19	42580418	ZNF574;ZNF574	5'UTR;1stExon	680	0.00210319	0.000573252	0.000263652	1	++
cg11418595	2	177052486	HOXD1	TSS1500	687	-0.0144459	0.00393839	0.000264334	1	--
cg13187967	11	13485012	BTBD10	TSS200	682	0.00294251	0.000802699	0.000266738	1	++
cg02827075	19	46094683	GPR4	Body	687	0.0340434	0.00929044	0.00026803	1	++
cg13471996	2	228497892	C2orf83;C2orf83;C2orf83;C2orf83	1stExon;1stExon;5'UTR;5'UTR	687	-0.0193709	0.00529014	0.000270756	1	--
cg21863334	20	36157405	BLCAP;BLCAP;BLCAP;BLCAP	TSS1500;TSS1500;TSS1500;TSS1500	687	-0.020223	0.00552709	0.000273684	1	--
cg24593372	1	54562121	C1orf83	Body	687	0.0234984	0.00642257	0.000273863	1	++
cg25503149	17	6160770			686	-0.0497377	0.0136186	0.000280823	1	--
cg05043627	14	100769643	SLC25A29	Body	681	0.0156772	0.00429589	0.00028403	1	++
cg26837479	8	146228149	ZNF252;C8orf77	Body;TSS200	680	0.00132322	0.000362765	0.000285965	1	++
cg25360147	5	140566664	PCDHB9	TSS1500	681	-0.00647603	0.00177669	0.000288784	1	--
cg12566149	19	11525678	RGL3;RGL3	Body;Body	688	0.0150975	0.00414233	0.00028889	1	++
cg08225549	8	80550161	STMN2	Body	681	-0.0596387	0.0163788	0.000292983	1	--
cg25621096	1	151032116	CDC42SE1;CDC42SE1;CDC42SE1;MLLT11;CDC42SE1	5'UTR;1stExon;5'UTR;TSS200;1stExon	683	0.0091398	0.00251233	0.00029654	1	++
cg24382918	3	141634157	ATP1B3	Body	682	-0.00978312	0.00269617	0.000307421	1	--

## Sheet: S21
Supplementary Table 21. EWAS of left-handedness, ALSPAC 7 years, basic model (top 100 CpGs)
	CHR	Position	Gene	Gene region	Weight	β	SE	p-value	q-value	Direction
cg19587237	1	54797076	SSBP3;SSBP3;SSBP3	Body;Body;Body	756	0.0254038	0.00477066	1.34694e-07	0.0635037	++
cg13048285	2	117509771			757	0.0381003	0.00738229	3.17084e-07	0.149494	++
cg11239826	5	180685955	TRIM52	Body	753	-0.0320602	0.00624609	3.67061e-07	0.173056	--
cg13289118	15	75255681			751	-0.0102293	0.00210782	1.49075e-06	0.702838	--
cg24902920	6	10416373	TFAP2A;TFAP2A	Body;TSS1500	745	0.00969165	0.00203982	2.44364e-06	1	++
cg11098525	4	1320231	MAEA;MAEA	Body;Body	707	-0.00795688	0.00168611	2.8789e-06	1	--
cg06678594	2	43573198	THADA;THADA	Body;Body	748	0.0134747	0.00289365	3.82818e-06	1	++
cg16590190	1	13909522	PDPN;PDPN	TSS1500;TSS1500	755	0.0386029	0.0083566	4.55157e-06	1	++
cg17097923	17	6679541	FBXO39	TSS200	749	0.00709686	0.00154091	4.86202e-06	1	++
cg17482706	9	77643371	C9orf41	TSS200	755	0.00417154	0.000910111	5.3813e-06	1	++
cg11858880	18	77319357			756	-0.0113541	0.00249294	6.15561e-06	1	--
cg25685519	14	52536721	NID2	TSS1500	751	0.0120468	0.00264594	6.20722e-06	1	++
cg03150378	16	29196699			736	-0.00521657	0.00115998	8.04883e-06	1	--
cg09641576	7	5338965	SLC29A4;SLC29A4	Body;Body	756	-0.0173902	0.00387565	8.39276e-06	1	--
cg26771272	17	18163183	FLII;SMCR7;SMCR7;SMCR7	TSS1500;TSS1500;TSS1500;TSS1500	733	-0.0102617	0.00229006	8.67074e-06	1	--
cg05529156	10	90107539	RNLS;RNLS	Body;Body	756	-0.00592106	0.00132707	9.41785e-06	1	--
cg16331281	10	4445958			757	0.0245063	0.00552619	1.06495e-05	1	++
cg23414876	16	67197396	HSF4;HSF4;HSF4;HSF4;FBXL8	5'UTR;1stExon;1stExon;5'UTR;Body	754	0.00423197	0.00096288	1.27262e-05	1	++
cg18639734	17	2860745	RAP1GAP2;RAP1GAP2	Body;Body	747	0.00665548	0.00151475	1.28206e-05	1	++
cg25190094	1	9321735	H6PD	Body	756	-0.019613	0.00449683	1.47835e-05	1	--
cg08571362	7	100224015	TFR2	Body	757	0.0231134	0.00530152	1.4896e-05	1	++
cg09519273	2	218550825	DIRC3	Body	752	-0.0102042	0.002353	1.65211e-05	1	--
cg26980937	14	56991775			744	-0.019249	0.00444769	1.72024e-05	1	--
cg10185767	6	169196473			699	-0.0214956	0.0049852	1.86205e-05	1	--
cg21961890	7	12510665			737	-0.0124519	0.00289789	1.97461e-05	1	--
cg22960133	10	3457118			746	-0.00696816	0.00162247	1.98958e-05	1	--
cg25580782	10	6003621	IL15RA;IL15RA	Body;Body	743	-0.00842703	0.00196233	1.994e-05	1	--
cg11973877	1	52195423	OSBPL9;OSBPL9;OSBPL9;OSBPL9;OSBPL9;OSBPL9;OSBPL9	TSS200;Body;5'UTR;Body;Body;TSS200;TSS200	752	0.00415593	0.000969731	2.06876e-05	1	++
cg21763226	7	15240141	TMEM195	3'UTR	751	0.0262809	0.00614503	2.15123e-05	1	++
cg07076845	14	103553804			757	-0.0166928	0.00391118	2.23342e-05	1	--
cg03296910	6	76309300			754	-0.00770097	0.00181027	2.37448e-05	1	--
cg26088333	12	9557316			747	-0.012673	0.00298423	2.4552e-05	1	--
cg27357675	7	149733103			712	-0.0168109	0.00396133	2.50173e-05	1	--
cg08699355	12	80328999	PPP1R12A;PPP1R12A	TSS200;5'UTR	754	0.0101203	0.00239933	2.77754e-05	1	++
cg07201017	10	102996571	FLJ41350	Body	757	-0.00972655	0.00232182	3.14314e-05	1	--
cg13381243	7	1103063	C7orf50;C7orf50;C7orf50	Body;Body;Body	754	-0.0255084	0.00611112	3.35531e-05	1	--
cg05502283	19	13203715	NFIX	3'UTR	755	-0.0222751	0.00533978	3.3915e-05	1	--
cg18492115	19	7528785	ARHGEF18;ARHGEF18	Body;Body	746	-0.00306991	0.00073607	3.40898e-05	1	--
cg09261403	7	923516	C7orf20	Body	754	0.0226829	0.00544457	3.47148e-05	1	++
cg03052541	17	78925543	RPTOR;RPTOR	Body;Body	755	0.0213731	0.00513093	3.47992e-05	1	++
cg26009192	2	120282200	SCTR	TSS200	757	-0.0272442	0.0065491	3.56236e-05	1	--
cg01167323	1	90284686			757	-0.020473	0.0049291	3.66254e-05	1	--
cg01924776	7	102087663	ORAI2;ORAI2	3'UTR;3'UTR	752	-0.0139496	0.00336631	3.81907e-05	1	--
cg11081694	1	91871709	HFM1	TSS1500	747	-0.00842975	0.00203431	3.82328e-05	1	--
cg13094252	8	104153753	C8orf56;BAALC;BAALC	TSS200;Body;Body	757	0.013801	0.00333429	3.89436e-05	1	++
cg07957806	17	17046995	MPRIP;MPRIP	Body;Body	742	-0.00457627	0.00110598	3.92581e-05	1	--
cg16545079	17	8055888	PER1	TSS200	755	0.00774269	0.0018735	4.00271e-05	1	++
cg16239257	14	75052674	LTBP2	Body	745	-0.0151511	0.00368224	4.32831e-05	1	--
cg18951587	2	64067908	UGP2;UGP2	TSS1500;TSS200	757	0.00386421	0.000941399	4.50545e-05	1	++
cg24533007	12	132146956			757	0.0264304	0.0064686	4.87736e-05	1	++
cg13804738	10	133000233	TCERG1L	Body	749	0.0206097	0.00505263	5.02795e-05	1	++
cg05268122	16	2288808			751	-0.0127715	0.00313257	5.06846e-05	1	--
cg27285720	1	89664782	GBP4	TSS200	756	-0.0150799	0.00369908	5.07262e-05	1	--
cg01602690	2	176987161	HOXD9	TSS1500	738	0.0118691	0.00291306	5.13313e-05	1	++
cg26593946	15	96869043	NR2F2	TSS200	752	-0.0112632	0.00276616	5.18052e-05	1	--
cg20662169	11	123504302	SCN3B;SCN3B	3'UTR;3'UTR	757	0.0373397	0.00917476	5.21957e-05	1	++
cg14071186	14	71635288			755	0.0329066	0.0080893	5.26315e-05	1	++
cg22047295	2	175462522	WIPF1;WIPF1	5'UTR;5'UTR	756	-0.00959209	0.00235925	5.31042e-05	1	--
cg05716278	10	6221273	PFKFB3	Body	753	-0.0111602	0.00275496	5.65241e-05	1	--
cg27306119	2	9144605	MBOAT2	TSS1500	755	0.00176025	0.000434673	5.68256e-05	1	++
cg23784160	7	2260593	MAD1L1;MAD1L1;MAD1L1	Body;Body;Body	728	-0.00793009	0.00195835	5.70997e-05	1	--
cg00399807	16	11368889	PRM3	TSS1500	755	-0.011679	0.0028866	5.77035e-05	1	--
cg08555612	3	71834640	PROK2;PROK2	TSS1500;TSS1500	746	0.00253287	0.000627369	5.98949e-05	1	++
cg03820837	3	28431690	ZCWPW2	TSS1500	743	0.0107551	0.00266583	6.06393e-05	1	++
cg23184756	7	63646960			753	-0.010969	0.00271932	6.07326e-05	1	--
cg23235622	20	34039349			754	-0.0119281	0.00295807	6.10572e-05	1	--
cg01592369	12	133564113	ZNF26	Body	744	-0.0722502	0.0179268	6.1684e-05	1	--
cg06687732	19	5892460			757	0.0323583	0.00803379	6.22186e-05	1	++
cg08732919	5	180581301	OR2V2	TSS1500	752	-0.0138415	0.00343871	6.29334e-05	1	--
cg17434154	1	217306590	ESRRG	5'UTR	757	0.046386	0.0115292	6.3372e-05	1	++
cg14829516	17	38249430	THRA;NR1D1	Body;Body	743	-0.0182038	0.00452783	6.42732e-05	1	--
cg01843999	5	137438732			746	-0.00829901	0.00206844	6.64702e-05	1	--
cg09192377	10	94834219	CYP26A1;CYP26A1	Body;Body	753	0.00521358	0.00130006	6.69464e-05	1	++
cg08732879	17	41180520	RND2	Body	757	0.0213521	0.00533359	6.88601e-05	1	++
cg26219458	14	95916220	C14orf49	Body	748	-0.02057	0.00515063	7.17444e-05	1	--
cg19419801	4	25235712	PI4K2B;PI4K2B	1stExon;5'UTR	757	0.00317455	0.00079531	7.2281e-05	1	++
cg01995067	16	863240	PRR25	Body	756	-0.0220725	0.00553431	7.32806e-05	1	--
cg12606891	1	7913872	UTS2;UTS2	TSS1500;TSS1500	750	-0.0126415	0.00316976	7.33813e-05	1	--
cg18358662	13	111305805	CARS2	Body	752	-0.0199392	0.00500244	7.40493e-05	1	--
cg25844605	20	5485475	LOC149837	TSS1500	757	-0.0377973	0.00949118	7.50842e-05	1	--
cg15513657	14	101244606			750	0.0104579	0.00262645	7.53376e-05	1	++
cg00561081	16	71493275	ZNF23	5'UTR	755	-0.0153147	0.00385067	7.67279e-05	1	--
cg07148651	8	1155617			750	-0.00623525	0.00156805	7.70136e-05	1	--
cg05944174	7	157368901	PTPRN2;PTPRN2;PTPRN2	Body;Body;Body	753	0.0268274	0.00674996	7.76104e-05	1	++
cg04969937	1	9883887	CLSTN1;CLSTN1;CLSTN1;CLSTN1	1stExon;1stExon;5'UTR;5'UTR	757	0.00450037	0.00113368	7.91018e-05	1	++
cg12060132	1	47395331	CYP4A11	3'UTR	756	-0.0384977	0.00972785	8.3176e-05	1	--
cg13608171	5	169931831	KCNIP1;KCNIP1;KCNIP1	Body;Body;Body	749	-0.0134964	0.00341393	8.46721e-05	1	--
cg14843337	3	12194691	SYN2;TIMP4;SYN2	Body;3'UTR;Body	757	-0.0105596	0.00267149	8.4803e-05	1	--
cg06837568	12	108634212	WSCD2	Body	757	0.0560844	0.0141895	8.48711e-05	1	++
cg02259550	16	58005416	CNGB1;CNGB1	TSS1500;TSS1500	757	0.0129984	0.00329298	8.66958e-05	1	++
cg27193021	11	14284425	SPON1	Body	749	-0.00417063	0.00105824	8.90167e-05	1	--
cg00546180	10	103815814	C10orf76	5'UTR	754	0.00327843	0.000832261	8.9657e-05	1	++
cg15913645	5	71603588	MRPS27	Body	749	0.0097844	0.0024849	9.03155e-05	1	++
cg16883805	17	52946			738	-0.0100326	0.00255262	9.31446e-05	1	--
cg03350366	11	71752919	NUMA1	5'UTR	747	0.0102675	0.00261365	9.37658e-05	1	++
cg20855001	13	114761326	RASA3	Body	757	-0.0236337	0.00604016	9.97997e-05	1	--
cg00090197	1	43738732	TMEM125	Body	750	-0.0108087	0.00276335	0.000100413	1	--
cg24650114	10	38692317	CDC10L	TSS1500	705	0.00682709	0.00174732	0.000102775	1	++
cg16679297	5	168534069	SLIT3	Body	755	-0.010587	0.00271328	0.000104296	1	--
cg11467680	2	817308			748	-0.0216619	0.00555157	0.000104378	1	--

## Sheet: S22
Supplementary Table 22. EWAS of left-handedness, ALSPAC 7 years, adjusted model (top 100 CpGs)
	CHR	Position	Gene	Gene region	Weight	β	SE	p-value	q-value	Direction
cg11239826	5	180685955	TRIM52	Body	738	-0.0348171	0.00635266	5.90007e-08	0.0278167	--
cg13048285	2	117509771			742	0.0395564	0.00738129	1.13219e-07	0.053379	++
cg13289118	15	75255681			736	-0.0109567	0.00212433	3.25289e-07	0.153362	--
cg19587237	1	54797076	SSBP3;SSBP3;SSBP3	Body;Body;Body	741	0.0240935	0.00478211	5.96787e-07	0.281364	++
cg18492115	19	7528785	ARHGEF18;ARHGEF18	Body;Body	731	-0.00355707	0.000746361	2.28807e-06	1	--
cg11858880	18	77319357			741	-0.011855	0.00251256	2.8658e-06	1	--
cg21961890	7	12510665			722	-0.0136322	0.00291847	3.60317e-06	1	--
cg06678594	2	43573198	THADA;THADA	Body;Body	733	0.0137413	0.00294612	3.7108e-06	1	++
cg27306119	2	9144605	MBOAT2	TSS1500	740	0.00199427	0.000436471	5.77869e-06	1	++
cg25685519	14	52536721	NID2	TSS1500	737	0.012034	0.0026397	6.06268e-06	1	++
cg10185767	6	169196473			684	-0.0230427	0.00507625	6.72142e-06	1	--
cg18639734	17	2860745	RAP1GAP2;RAP1GAP2	Body;Body	732	0.00677296	0.00152151	9.92157e-06	1	++
cg03296910	6	76309300			739	-0.00802097	0.00181969	1.20598e-05	1	--
cg24902920	6	10416373	TFAP2A;TFAP2A	Body;TSS1500	730	0.00893041	0.00204604	1.46536e-05	1	++
cg07201017	10	102996571	FLJ41350	Body	742	-0.0102177	0.00235379	1.62484e-05	1	--
cg16545079	17	8055888	PER1	TSS200	740	0.00814323	0.00188391	1.76358e-05	1	++
cg22700686	1	153538764	S100A2	TSS1500	741	-0.018911	0.00438879	1.8721e-05	1	--
cg09261403	7	923516	C7orf20	Body	739	0.0239363	0.00556161	1.9153e-05	1	++
cg22047295	2	175462522	WIPF1;WIPF1	5'UTR;5'UTR	741	-0.0101865	0.00237602	2.05977e-05	1	--
cg11081694	1	91871709	HFM1	TSS1500	732	-0.00865225	0.00203081	2.31874e-05	1	--
cg08699355	12	80328999	PPP1R12A;PPP1R12A	TSS200;5'UTR	739	0.010287	0.00241613	2.34516e-05	1	++
cg25844605	20	5485475	LOC149837	TSS1500	742	-0.0409018	0.0096279	2.44147e-05	1	--
cg05502283	19	13203715	NFIX	3'UTR	740	-0.0227586	0.0053668	2.52463e-05	1	--
cg26593946	15	96869043	NR2F2	TSS200	737	-0.0118789	0.00280839	2.64738e-05	1	--
cg02953457	6	30638580	DHX16;DHX16	Body;Body	742	-0.0220073	0.00521035	2.7152e-05	1	--
cg23414876	16	67197396	HSF4;HSF4;HSF4;HSF4;FBXL8	5'UTR;1stExon;1stExon;5'UTR;Body	739	0.00408593	0.000974583	3.10927e-05	1	++
cg00399807	16	11368889	PRM3	TSS1500	740	-0.0122781	0.00293162	3.16731e-05	1	--
cg13381243	7	1103063	C7orf50;C7orf50;C7orf50	Body;Body;Body	739	-0.0259588	0.00622384	3.41184e-05	1	--
cg24923219	11	94964236	SESN3;SESN3	1stExon;5'UTR	735	0.00250558	0.000600922	3.43303e-05	1	++
cg03150378	16	29196699			721	-0.00487967	0.00117187	3.52407e-05	1	--
cg17097923	17	6679541	FBXO39	TSS200	734	0.00638816	0.00153461	3.53563e-05	1	++
cg21411674	3	10332589	GHRL;GHRL;GHRL;GHRL;GHRL;GHRL;GHRL;GHRLOS;GHRL;GHRLOS;GHRLOS;GHRL;GHRL;GHRL;GHRL;GHRLOS	TSS200;Body;Body;TSS200;Body;Body;Body;Body;Body;Body;Body;Body;Body;Body;Body;Body	739	-0.0116619	0.00280416	3.59269e-05	1	--
cg07834682	2	45232641	SIX2	3'UTR	737	-0.0138172	0.00332593	3.66201e-05	1	--
cg11098525	4	1320231	MAEA;MAEA	Body;Body	693	-0.00699246	0.00168385	3.71707e-05	1	--
cg16331281	10	4445958			742	0.023188	0.00560437	3.93226e-05	1	++
cg17482706	9	77643371	C9orf41	TSS200	740	0.00380944	0.000923118	4.11769e-05	1	++
cg16590190	1	13909522	PDPN;PDPN	TSS1500;TSS1500	740	0.0348394	0.00845181	4.19872e-05	1	++
cg02866639	17	1808743			742	-0.0411538	0.00999307	4.26716e-05	1	--
cg23235622	20	34039349			739	-0.0119656	0.00290618	4.28625e-05	1	--
cg12163448	2	170430473	FASTKD1	TSS200	741	-0.00726009	0.00176351	4.29292e-05	1	--
cg06911113	1	20512617	UBXN10;UBXN10	5'UTR;1stExon	740	0.00539548	0.00131829	4.75302e-05	1	++
cg02095605	5	60141082	ELOVL7;ELOVL7	TSS1500;TSS1500	736	0.00694683	0.00170238	5.00468e-05	1	++
cg07957806	17	17046995	MPRIP;MPRIP	Body;Body	727	-0.00459388	0.00113005	5.34746e-05	1	--
cg16411251	14	59932250	GPR135	TSS200	733	0.0048136	0.0011867	5.54568e-05	1	++
cg06211794	20	48330587	B4GALT5	TSS200	738	0.00594308	0.00146794	5.72302e-05	1	++
cg16239257	14	75052674	LTBP2	Body	730	-0.0151099	0.00373346	5.76353e-05	1	--
cg19343464	11	105481509	GRIA4;GRIA4;GRIA4;GRIA4;GRIA4	5'UTR;5'UTR;5'UTR;1stExon;5'UTR	729	-0.00609682	0.00150713	5.80891e-05	1	--
cg18358662	13	111305805	CARS2	Body	737	-0.0203896	0.00504268	5.84884e-05	1	--
cg21763226	7	15240141	TMEM195	3'UTR	736	0.0253273	0.00626541	5.87413e-05	1	++
cg02980604	17	34058433	RASL10B	TSS1500	740	-0.0171446	0.00424506	5.96182e-05	1	--
cg11236526	3	64430940			714	0.0111448	0.00276088	6.03538e-05	1	++
cg13237147	3	188745304			735	0.0114882	0.00285079	6.19049e-05	1	++
cg22960133	10	3457118			731	-0.00657796	0.00163397	6.29993e-05	1	--
cg07076845	14	103553804			742	-0.0157584	0.00391653	6.34743e-05	1	--
cg27357675	7	149733103			699	-0.0160446	0.00398845	6.40985e-05	1	--
cg15939920	17	35457385	ACACA;ACACA;ACACA;ACACA;ACACA	Body;Body;Body;Body;Body	742	-0.0198571	0.0049388	6.42509e-05	1	--
cg00561081	16	71493275	ZNF23	5'UTR	740	-0.0158155	0.00393435	6.4483e-05	1	--
cg25415932	3	9791051	OGG1;OGG1;OGG1;OGG1;OGG1;OGG1;OGG1;OGG1	TSS1500;TSS1500;TSS1500;TSS1500;TSS1500;TSS1500;TSS1500;TSS1500	738	0.0202077	0.00504576	6.86212e-05	1	++
cg25580782	10	6003621	IL15RA;IL15RA	Body;Body	728	-0.0079385	0.00198474	7.01901e-05	1	--
cg26771272	17	18163183	FLII;SMCR7;SMCR7;SMCR7	TSS1500;TSS1500;TSS1500;TSS1500	718	-0.00934256	0.00233752	7.11628e-05	1	--
cg26980937	14	56991775			729	-0.0176851	0.00442845	7.20166e-05	1	--
cg27285720	1	89664782	GBP4	TSS200	741	-0.0149888	0.00375397	7.21125e-05	1	--
cg00090197	1	43738732	TMEM125	Body	735	-0.0111754	0.00279929	7.23373e-05	1	--
cg08813349	13	100630430			737	-0.0069242	0.00173484	7.26078e-05	1	--
cg06263843	15	83240550	CPEB1;CPEB1;CPEB1;CPEB1;CPEB1;CPEB1;CPEB1	5'UTR;5'UTR;5'UTR;1stExon;Body;1stExon;1stExon	742	-0.0102235	0.00256344	7.34739e-05	1	--
cg03928961	3	196693980	PIGZ	5'UTR	740	-0.0306138	0.0076768	7.36064e-05	1	--
cg18023666	5	173148154			741	-0.0141204	0.00354303	7.43406e-05	1	--
cg09519273	2	218550825	DIRC3	Body	737	-0.00946961	0.00237833	7.55445e-05	1	--
cg26765300	8	42691869	THAP1;THAP1	3'UTR;3'UTR	724	-0.0177136	0.00445003	7.6017e-05	1	--
cg26088333	12	9557316			732	-0.0121236	0.00304772	7.67559e-05	1	--
cg14058848	9	130479114	TTC16;PTRH1	Body;TSS1500	739	0.0232833	0.00585847	7.78338e-05	1	++
cg01995067	16	863240	PRR25	Body	741	-0.0223631	0.00563927	8.06424e-05	1	--
cg09794600	7	158858998	VIPR2	Body	741	-0.00975042	0.00245904	8.07954e-05	1	--
cg11133658	8	27779092	SCARA5	Body	676	-0.0334606	0.00844077	8.19012e-05	1	--
cg18951587	2	64067908	UGP2;UGP2	TSS1500;TSS200	742	0.0038012	0.000959656	8.21641e-05	1	++
cg10927178	20	56883965	RAB22A;PPP4R1L	TSS1500;Body	740	-0.0199962	0.00504995	8.26326e-05	1	--
cg19234484	1	242159456	MAP1LC3C	3'UTR	740	-0.0204599	0.00516717	8.26618e-05	1	--
cg13137376	6	30712221	IER3	1stExon	737	0.004745	0.00119894	8.33529e-05	1	++
cg14843337	3	12194691	SYN2;TIMP4;SYN2	Body;3'UTR;Body	742	-0.0107446	0.002716	8.38567e-05	1	--
cg06002524	14	74225627	C14orf43;C14orf43	5'UTR;5'UTR	741	0.00415345	0.00105103	8.53413e-05	1	++
cg13804738	10	133000233	TCERG1L	Body	734	0.020059	0.00507607	8.54533e-05	1	++
cg09641576	7	5338965	SLC29A4;SLC29A4	Body;Body	741	-0.0153258	0.00388826	8.89717e-05	1	--
cg03820837	3	28431690	ZCWPW2	TSS1500	728	0.0105581	0.0026811	9.04407e-05	1	++
cg16591816	6	170190914	C6orf122;C6orf208	Body;Body	733	0.00602163	0.00153016	9.13764e-05	1	++
cg00018896	13	25671476	PABPC3	1stExon	740	0.0172772	0.00439105	9.15328e-05	1	++
cg08422456	4	88720194	IBSP	TSS1500	742	0.0173108	0.00440115	9.20271e-05	1	++
cg22537597	7	149530984	SSPO	3'UTR	737	0.0196261	0.00499254	9.29033e-05	1	++
cg12606891	1	7913872	UTS2;UTS2	TSS1500;TSS1500	735	-0.0127213	0.00323687	9.32932e-05	1	--
cg03970229	11	92702507	MTNR1B	TSS1500	742	-0.0225021	0.00572837	9.39419e-05	1	--
cg06837568	12	108634212	WSCD2	Body	742	0.0559978	0.0142749	9.60147e-05	1	++
cg25228280	19	22321700			731	0.0109898	0.00280712	9.92721e-05	1	++
cg03052541	17	78925543	RPTOR;RPTOR	Body;Body	740	0.0202605	0.00518048	0.000100789	1	++
cg07148651	8	1155617			735	-0.00625145	0.00160128	0.00010371	1	--
cg24533007	12	132146956			742	0.02553	0.00654354	0.000104662	1	++
cg18068059	3	172083178	FNDC3B;FNDC3B	Body;Body	742	0.017921	0.00459393	0.000104892	1	++
cg01019028	6	132722810	MOXD1	TSS200	731	-0.0051555	0.00132177	0.000105277	1	--
cg17107501	10	98982314	ARHGAP19	3'UTR	719	-0.0230571	0.00591256	0.000105775	1	--
cg14283328	11	66823587	RHOD	TSS1500	742	-0.0315235	0.00808521	0.00010579	1	--
cg24650114	10	38692317	CDC10L	TSS1500	691	0.00690569	0.00177223	0.000107515	1	++
cg12060132	1	47395331	CYP4A11	3'UTR	741	-0.0378998	0.00975958	0.00011266	1	--

## Sheet: S23
Supplementary Table 23. EWAS of left-handedness, ALSPAC 17 years, basic model (top 100 CpGs)
	CHR	Position	Gene	Gene region	Weight	β	SE	p-value	q-value	Direction
cg12906880	6	34294802	NUDT3	Body	759	-0.0153445	0.00301404	4.53662e-07	0.213886	--
cg01942127	3	53529259	CACNA1D;CACNA1D;CACNA1D	1stExon;1stExon;1stExon	748	0.0131157	0.00262647	7.44321e-07	0.350921	++
cg27648808	5	168439973	SLIT3	Body	742	-0.0124351	0.00261104	2.31686e-06	1	--
cg00425827	5	131346715	ACSL6;ACSL6	Body;Body	755	-0.0174343	0.0036805	2.61003e-06	1	--
cg19992906	12	126055778	TMEM132B	Body	759	0.027969	0.00600447	3.79342e-06	1	++
cg14655855	9	13278626			753	0.0197252	0.00424707	4.05006e-06	1	++
cg15501231	6	31737630	C6orf27	Body	758	0.0133823	0.00292679	5.66565e-06	1	++
cg02242894	16	31494799	SLC5A2	Body	758	-0.0133098	0.0029274	6.38071e-06	1	--
cg20548564	13	28240073	POLR1D	Body	747	0.00682436	0.00150343	6.61974e-06	1	++
cg08815670	10	76995827	COMTD1	TSS200	750	0.00334579	0.000758212	1.17672e-05	1	++
cg19922189	5	139505246	C5orf53	TSS1500	754	0.0133754	0.00306444	1.45799e-05	1	++
cg24227397	22	49640134			757	-0.0163631	0.00377175	1.6385e-05	1	--
cg13226861	2	42001767			759	0.0320282	0.0074013	1.71932e-05	1	++
cg18179491	4	763508	PCGF3	3'UTR	727	-0.0135657	0.00314847	1.87833e-05	1	--
cg17039011	10	694058	DIP2C	Body	759	-0.0152464	0.00354054	1.88741e-05	1	--
cg07645004	6	30520221	GNL1	Body	759	-0.0163569	0.0037997	1.89946e-05	1	--
cg16722964	19	57078783	ZNF470	TSS200	754	0.00708539	0.00165078	2.01e-05	1	++
cg00951302	6	166131985			759	-0.0307225	0.0071774	2.114e-05	1	--
cg07710833	5	112022460			759	-0.0243653	0.00569967	2.16638e-05	1	--
cg10729167	10	111220101			759	0.0253891	0.00595363	2.26709e-05	1	++
cg03208501	2	111435828	BUB1	TSS200	758	0.00462222	0.00108592	2.34768e-05	1	++
cg12812394	12	123473974	PITPNM2	Body	758	-0.0185028	0.0043472	2.35021e-05	1	--
cg04088212	11	2019859	H19	TSS1500	754	-0.0223999	0.00526831	2.39766e-05	1	--
cg08181060	6	143663339			753	0.0107833	0.00253947	2.45665e-05	1	++
cg26154937	10	49674883	ARHGAP22	Body	759	0.0352938	0.00836759	2.77574e-05	1	++
cg04993795	4	57770421			756	-0.00678131	0.00161097	2.88073e-05	1	--
cg08179155	4	132646574			759	-0.0380996	0.00907335	3.01126e-05	1	--
cg26402555	14	105750534	BRF1	Body	742	0.0102979	0.00246815	3.38743e-05	1	++
cg06620541	2	155101803	GALNT13	Body	759	-0.0249059	0.00597171	3.40244e-05	1	--
cg14179950	9	81889973			759	0.0238084	0.00570863	3.40319e-05	1	++
cg07007152	7	155601965	SHH	Body	757	0.00853301	0.00205399	3.64928e-05	1	++
cg16359521	1	19535871	UBR4	Body	752	0.00310625	0.000748804	3.74805e-05	1	++
cg03269363	22	50007725			754	-0.0159916	0.00386838	3.98307e-05	1	--
cg12596171	3	113251061	SIDT1	TSS200	754	0.0035479	0.000858315	3.98912e-05	1	++
cg25561792	17	62050205	SCN4A;SCN4A	5'UTR;1stExon	758	-0.0264167	0.00639137	3.99348e-05	1	--
cg27539720	17	60023175	MED13	3'UTR	759	0.0283165	0.00689842	4.50358e-05	1	++
cg25074751	2	173601133	RAPGEF4;LOC91149	Body;TSS200	748	0.00657919	0.00160283	4.51189e-05	1	++
cg18962288	2	65541060	SPRED2;SPRED2	Body;Body	749	-0.0179731	0.00438086	4.55126e-05	1	--
cg08225549	8	80550161	STMN2	Body	748	-0.0560875	0.0136856	4.63648e-05	1	--
cg11620409	11	61519687	C11orf9	TSS1500	759	-0.0257106	0.00629142	4.86261e-05	1	--
cg05218689	11	94680856			747	-0.00878046	0.00215069	4.95328e-05	1	--
cg09894136	22	43833175	MPPED1	Body	759	-0.0228147	0.00559292	5.01649e-05	1	--
cg09888183	7	63020706			759	0.0404987	0.00994473	5.16258e-05	1	++
cg24237813	20	50385486	ATP9A	TSS1500	756	0.00879306	0.00216312	5.32724e-05	1	++
cg27539234	17	7218945	GPS2	TSS1500	759	0.0112957	0.00278359	5.4842e-05	1	++
cg03492469	16	126855	MPG;MPG;MPG	TSS200;TSS1500;TSS1500	759	0.0116316	0.0028673	5.5151e-05	1	++
cg09816180	4	72650088	GC	TSS1500	754	-0.0130683	0.00323146	5.81571e-05	1	--
cg00810292	13	75900518	TBC1D4	Body	759	0.0349829	0.00866053	5.92749e-05	1	++
cg03717442	2	45172201	SIX3	3'UTR	759	0.0240432	0.00595306	5.94127e-05	1	++
cg24089600	13	110960177	COL4A1;COL4A2	TSS1500;5'UTR	751	0.0143403	0.00355489	6.06848e-05	1	++
cg25868286	17	42092488	TMEM101	TSS200	750	0.00745872	0.00185	6.12629e-05	1	++
cg10775195	14	77292399	C14orf166B	TSS1500	756	-0.0205897	0.00511539	6.29368e-05	1	--
cg04688476	22	37215656	PVALB	TSS200	759	-0.022061	0.00548226	6.3168e-05	1	--
cg23112213	5	137549144	CDC23	TSS200	751	-0.00636097	0.00158141	6.36939e-05	1	--
cg20165301	17	46181346			757	0.0198612	0.00494214	6.45976e-05	1	++
cg03082830	7	1165370	C7orf50;C7orf50;C7orf50	Body;Body;Body	757	-0.0211437	0.00526551	6.54685e-05	1	--
cg16910379	17	30186525	C17orf79	TSS200	756	-0.00187733	0.000467703	6.59087e-05	1	--
cg23073439	6	18155296	KDM1B;TPMT;TPMT	TSS1500;1stExon;5'UTR	751	-0.00813944	0.00202773	6.59194e-05	1	--
cg11090826	3	69101654	TMF1	TSS200	757	0.00119634	0.000298522	6.76717e-05	1	++
cg19516105	1	26551710			757	0.0257062	0.00641501	6.77661e-05	1	++
cg13922757	9	140613912	EHMT1;EHMT1	Body;Body	746	-0.0100979	0.00251977	6.77917e-05	1	--
cg14833439	1	114324759	RSBN1	Body	754	-0.0131136	0.00327452	6.84885e-05	1	--
cg00001510	19	54746945	LILRA6	TSS1500	759	-0.0168172	0.00419972	6.85455e-05	1	--
cg06376992	15	79296424	RASGRF1;RASGRF1;RASGRF1	Body;Body;5'UTR	732	0.015443	0.00385636	6.87461e-05	1	++
cg16636271	6	139694487	CITED2;CITED2;CITED2	Body;Body;Body	758	0.00841347	0.00210837	7.25971e-05	1	++
cg07625619	16	69050940	TMCO7	Body	752	-0.00865257	0.00216979	7.34863e-05	1	--
cg21913888	19	50084626	PRRG2;NOSIP;PRRG2	1stExon;TSS1500;5'UTR	759	0.0274683	0.00689706	7.49873e-05	1	++
cg26230390	2	203130314	NOP58	TSS200	754	0.00463727	0.00116526	7.59747e-05	1	++
cg25588680	2	201635383	AOX2P	TSS200	755	-0.00853201	0.00214396	7.59768e-05	1	--
cg12591770	15	100913571			754	0.00899462	0.00226644	7.94836e-05	1	++
cg15039414	2	43454687	ZFP36L2;LOC100129726	TSS1500;Body	751	-0.00251115	0.000632891	7.98002e-05	1	--
cg10938046	6	43969577	C6orf223	Body	754	-0.0169531	0.00427474	8.03789e-05	1	--
cg12594581	3	196750426	MFI2;MFI2	Body;Body	759	-0.0271644	0.00685217	8.08339e-05	1	--
cg22965016	13	111917916	ARHGEF7;ARHGEF7;ARHGEF7;ARHGEF7;ARHGEF7	Body;Body;Body;Body;Body	752	0.0112164	0.00282998	8.12216e-05	1	++
cg04392578	14	33668261	NPAS3;NPAS3;NPAS3;NPAS3	Body;Body;Body;Body	759	-0.0128672	0.00325004	8.25932e-05	1	--
cg17579753	17	34079998	GAS2L2	TSS200	759	-0.0202563	0.00511936	8.33764e-05	1	--
cg19188632	2	3702481			758	-0.0206772	0.00522708	8.37332e-05	1	--
cg12368694	11	70391098	SHANK2;SHANK2	Body;Body	759	0.028346	0.00716886	8.43219e-05	1	++
cg04919274	3	154146871	GPR149	1stExon	756	0.00836046	0.00211516	8.4839e-05	1	++
cg04301682	4	76598670	G3BP2;G3BP2;G3BP2	TSS200;TSS1500;TSS200	758	-0.00264501	0.000669496	8.54758e-05	1	--
cg23322531	2	8821658	ID2	TSS1500	758	-0.00147194	0.000372818	8.63923e-05	1	--
cg23648991	6	158586534	SERAC1	5'UTR	748	-0.0117423	0.00297586	8.73154e-05	1	--
cg20255699	19	458405	SHC2	Body	755	0.0260479	0.00660244	8.74732e-05	1	++
cg22877212	3	4355346	SETMAR;SETMAR	Body;Body	749	-0.00837177	0.00212398	8.8851e-05	1	--
cg06619766	2	223171105			756	0.00533415	0.00135769	9.34887e-05	1	++
cg00627621	8	126442449	TRIB1	TSS200	749	-0.00210231	0.000535217	9.39112e-05	1	--
cg09496391	8	701366			753	0.0152858	0.00389379	9.47411e-05	1	++
cg20411340	1	1175370			759	0.0306087	0.00781326	9.78566e-05	1	++
cg25695424	13	114783597	RASA3	Body	744	0.00685148	0.00174959	9.86347e-05	1	++
cg14786381	18	56802613			755	0.0138695	0.00354361	9.93408e-05	1	++
cg01351295	3	195700735	SDHAP1	Body	758	-0.0220123	0.00562528	9.9646e-05	1	--
cg14241836	7	48124921			756	0.0169686	0.00433633	9.96601e-05	1	++
cg18061259	12	106977641	RFX4	Body	745	-0.00298063	0.000761654	9.97012e-05	1	--
cg27666046	17	80279077	SECTM1	3'UTR	759	-0.0331026	0.00846657	0.000100975	1	--
cg10185767	6	169196473			731	-0.0325849	0.00833512	0.000101518	1	--
cg26339484	1	935863	HES4;HES4	TSS1500;TSS1500	754	0.00447916	0.00114609	0.000101695	1	++
cg03672621	16	21514406	LOC100271836	TSS1500	758	-0.0106075	0.0027204	0.000105405	1	--
cg24651966	4	123664110	BBS12	Body	758	-0.0104469	0.0026794	0.000105513	1	--
cg22396279	1	154580739	ADAR;ADAR;ADAR;ADAR	5'UTR;TSS200;TSS200;TSS200	756	0.00846659	0.00217171	0.000105703	1	++
cg20105583	4	143819041			757	-0.0145549	0.00373401	0.000105971	1	--

[truncated: 6 more sheets: S24, S25, S26, S27, S28, S29]
